# Supplementary material for: Mapping and phasing of structural variation in patient genomes using nanopore sequencing
Source: PubMed Central journal article supplement (PMC5673902; doi:10.1038/s41467-017-01343-4), 2017-11-06
Supplement: 41467_2017_1343_MOESM1_ESM.pdf [file 41467_2017_1343_MOESM1_ESM.pdf]

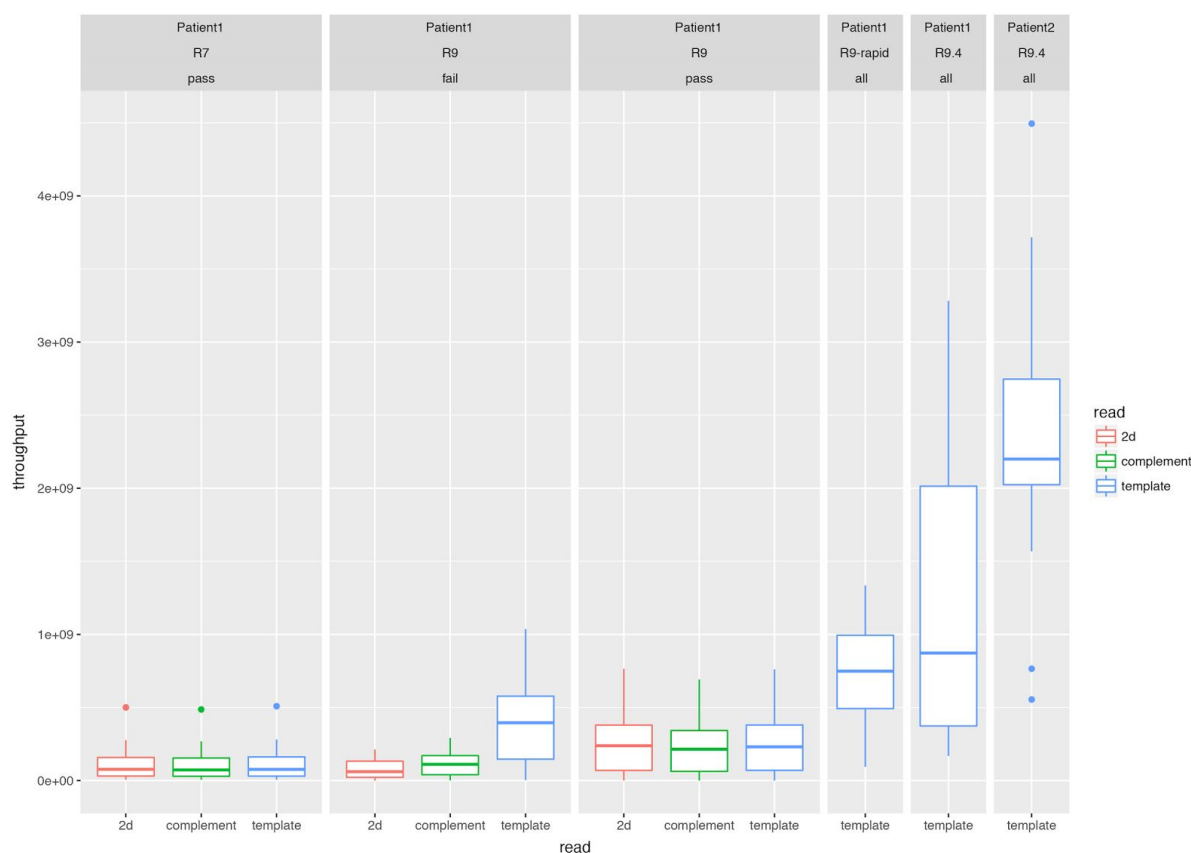

### Supplementary Figure 1. Distributions of sequencing throughput for MinION sequencing runs.

For each sequencing run the throughput was calculated as the sum of the read lengths for each type of read (template, complement and 2D). The boxplots indicate the distribution of the throughput for multiple runs, stratified by data type (R7, R9\_pass, R9\_fail, R9\_rapid and R9.4). The y-axis indicates throughput in bases and the x-axis shows read types. R7, R9 and R9.4 represent different nanopore sequencing chemistries for the MinION. Pass and fail indicates reads that were classified as either 'pass' or 'fail' following Metrichor basecalling. 2D indicates consensus reads generated from a template and complement read of a DNA duplex. 1D template and complement indicate reads derived from only one of the two strands (template or complement) of a DNA duplex. 'Rapid' means data from a rapid nanopore library preparation.

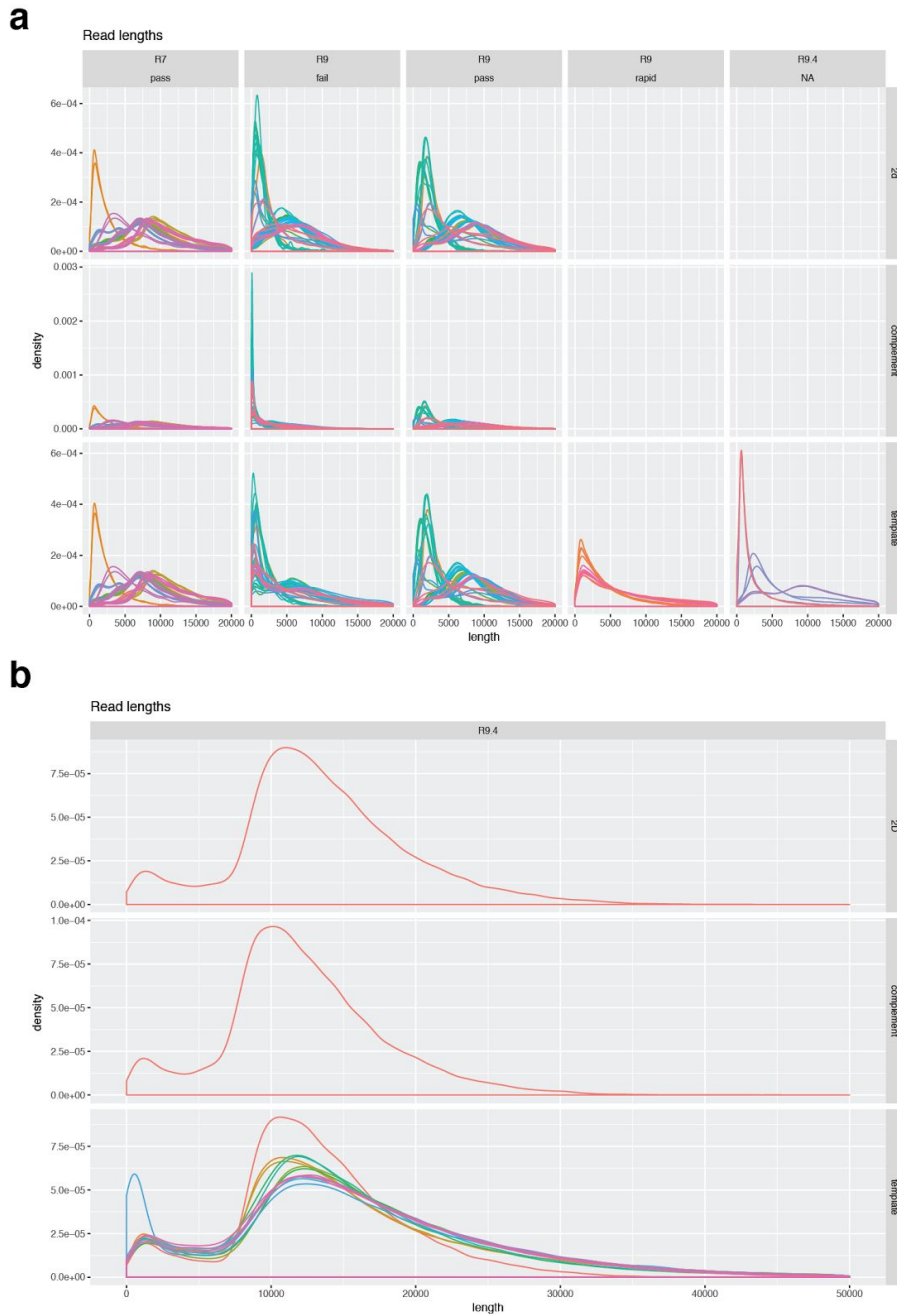

**Supplementary Figure 2. MinION run read length distributions.**

**a** Read length distributions for runs for Patient1. **b** Read length distributions for runs for Patient2. MinION sequence runs are indicated by different line colors. Read lengths were calculated for all 1D and 2D reads in the fastq file for each run. Plots are stratified by run type (R7, R9, R9\_rapid and R9.4) and data quality ('passed' and 'failed' R9 reads following EPI2ME basecalling) in the horizontal direction and by read type (2D, 1D template, 1D complement) in the vertical direction. R7, R9 and R9.4 represent different nanopore sequencing chemistries for MinION. Pass and fail indicates reads that were classified as either 'pass' or 'fail' following Metrichor basecalling. 2D indicates consensus reads generated from a template and complement read of a DNA duplex. 1D template and complement indicate reads derived from only one of the two strands (template or complement) of a DNA duplex. 'Rapid' means data from a rapid nanopore library preparation.

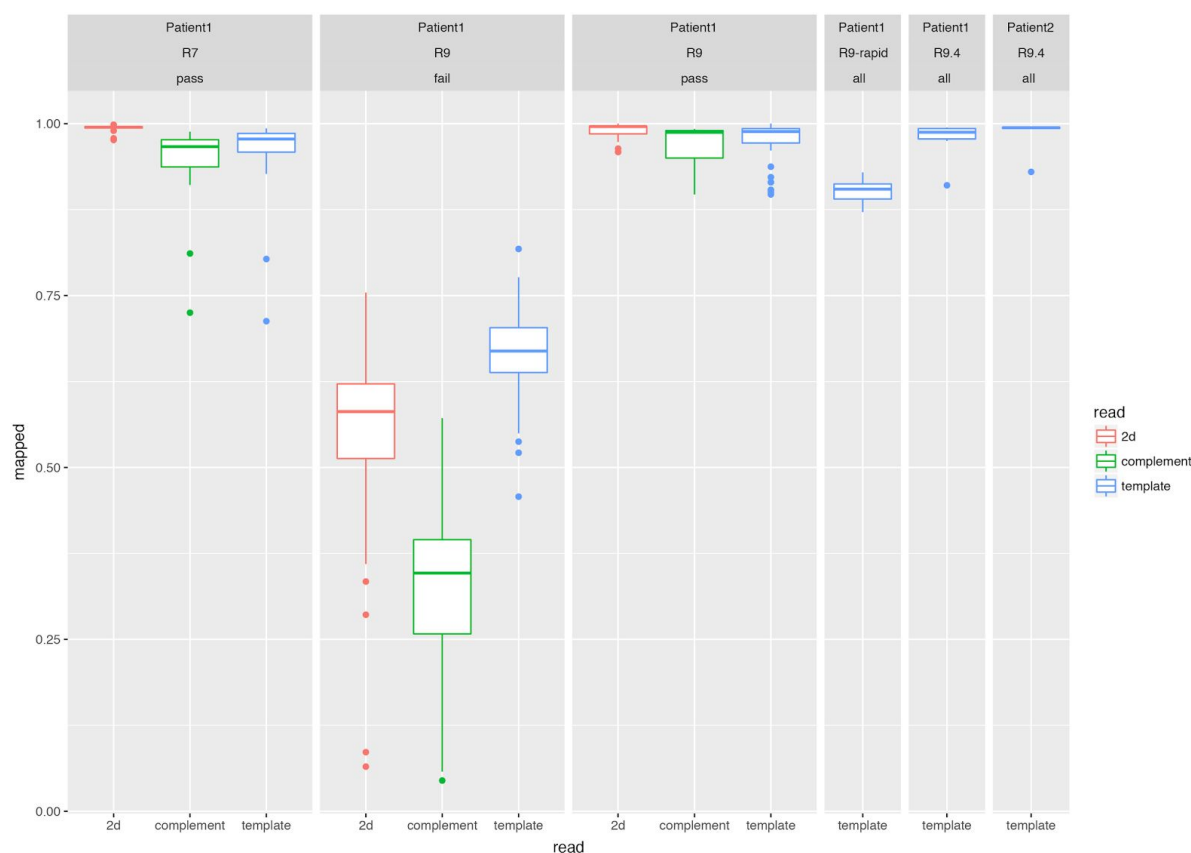

**Supplementary Figure 3. Distributions of the percentages of reads mapped by LAST.**

For each sequencing run the percentage of mapped reads was calculated. The boxplots indicate the distribution of the percentages of mapped reads for multiple runs, stratified by data type (R7, R9\_pass, R9\_fail, R9\_rapid and R9.4). R7, R9 and R9.4 represent different nanopore sequencing chemistries for MinION. Pass and fail indicates reads that were classified as either 'pass' or 'fail' following Metrichor basecalling. 2D indicates consensus reads generated from a template and complement read of a DNA duplex. 1D template and complement indicate reads derived from only one of the two strands (template or complement) of a DNA duplex. 'Rapid' means data from a rapid nanopore library preparation.

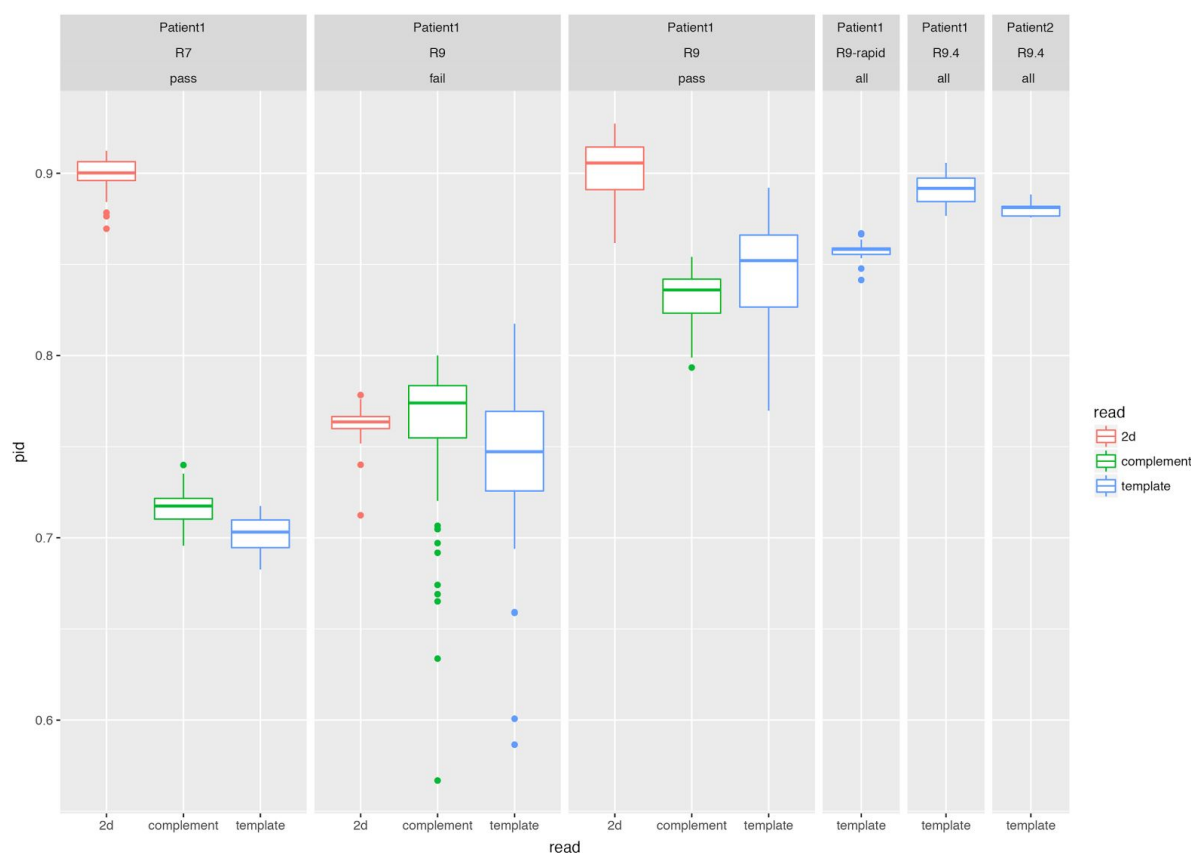

#### Supplementary Figure 4. Distributions of alignment accuracies of LAST alignments.

For each sequencing run the percentage of identical bases (PID) between reference and read sequences were calculated in the alignments. The calculation was done per mapped segment by dividing the amount of identical bases by the length of the mapped segment. Boxplots show the distribution of percentages stratified by run type (R7, R9, R9\_rapid and R9.4) and data quality ('passed' and 'failed' R9 reads following EPI2ME basecalling) and by read type (2D, 1D template, 1D complement). R7, R9 and R9.4 represent different nanopore sequencing chemistries for MinION. Pass and fail indicates reads that were classified as either 'pass' or 'fail' following Metrichor basecalling. 2D indicates consensus reads generated from a template and complement read of a DNA duplex. 1D template and complement indicate reads derived from only one of the two strands (template or complement) of a DNA duplex. 'Rapid' means data from a rapid nanopore library preparation.

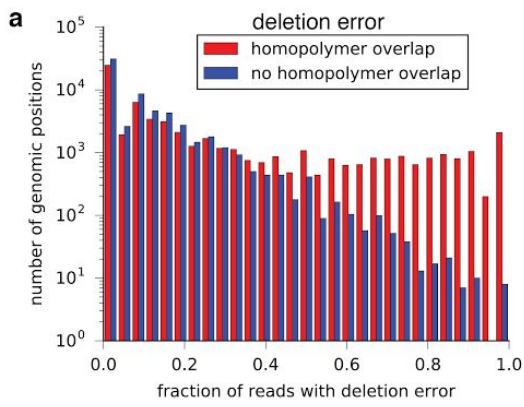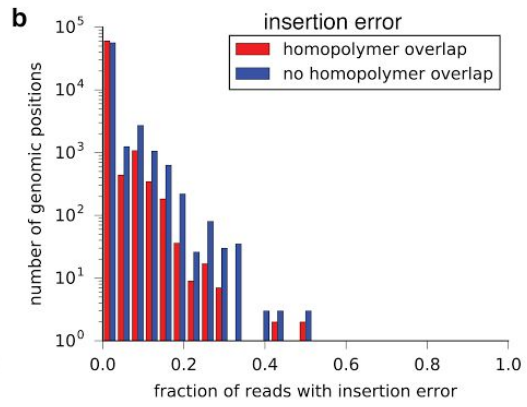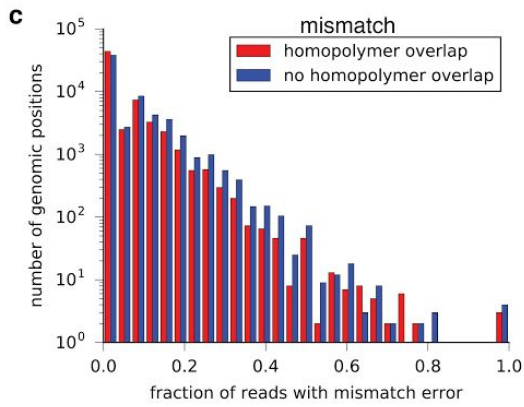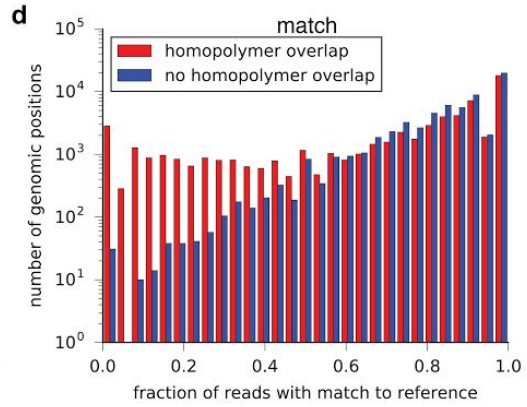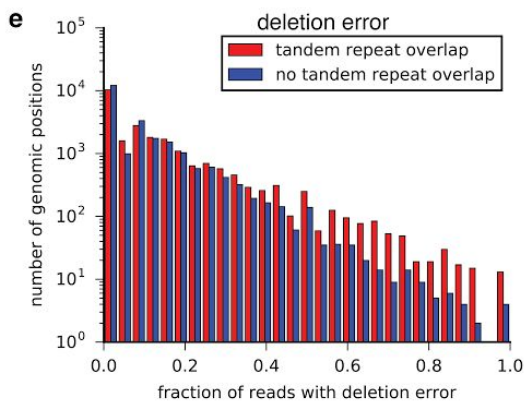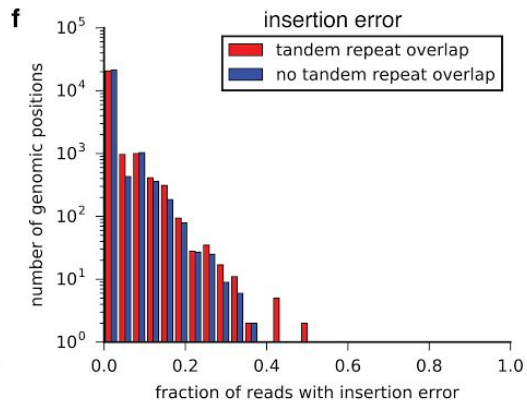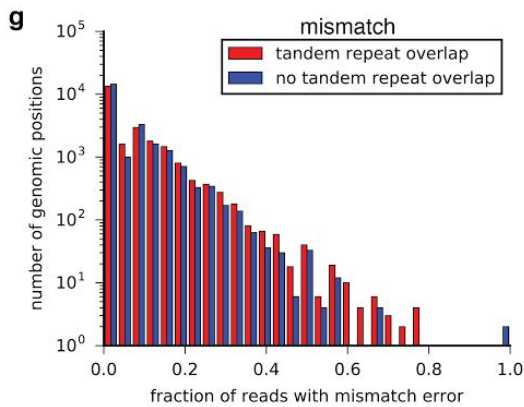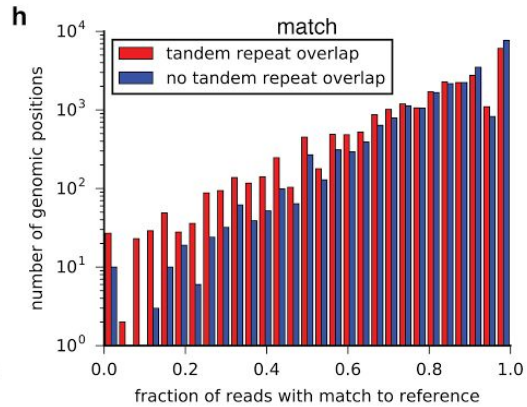

**Supplementary Figure 5. Error profiles of R9.4 MinION sequencing data related to homopolymer and tandem repeat context.**

A set of 1,064,470 randomly generated genomic positions (excluding polymorphic sites) were sampled from chromosome 1. For each of these positions the fraction of reads with deletion errors, insertion errors and mismatches was determined, based on MinION data from Patient2 (R9.4). In addition, the distance to the closest homopolymer (**Methods**) or tandem repeat (UCSC Simple Repeats track) was calculated. **a-d** Overlap of genomic sites with and without homopolymer overlap (without: >200bp away from nearest homopolymer), stratified by error class (**a** deletion, **b** insertion, **c** mismatch, **d** fraction of bases matching the reference). **e-h** Overlap of genomic sites with and without tandem repeat overlap (with: tandem repeat overlap and no homopolymer overlap, without: >300bp away from nearest tandem repeat and no homopolymer overlap), stratified by error class (**e** deletion, **f** insertion, **g** mismatch, **h** fraction of bases matching the reference).

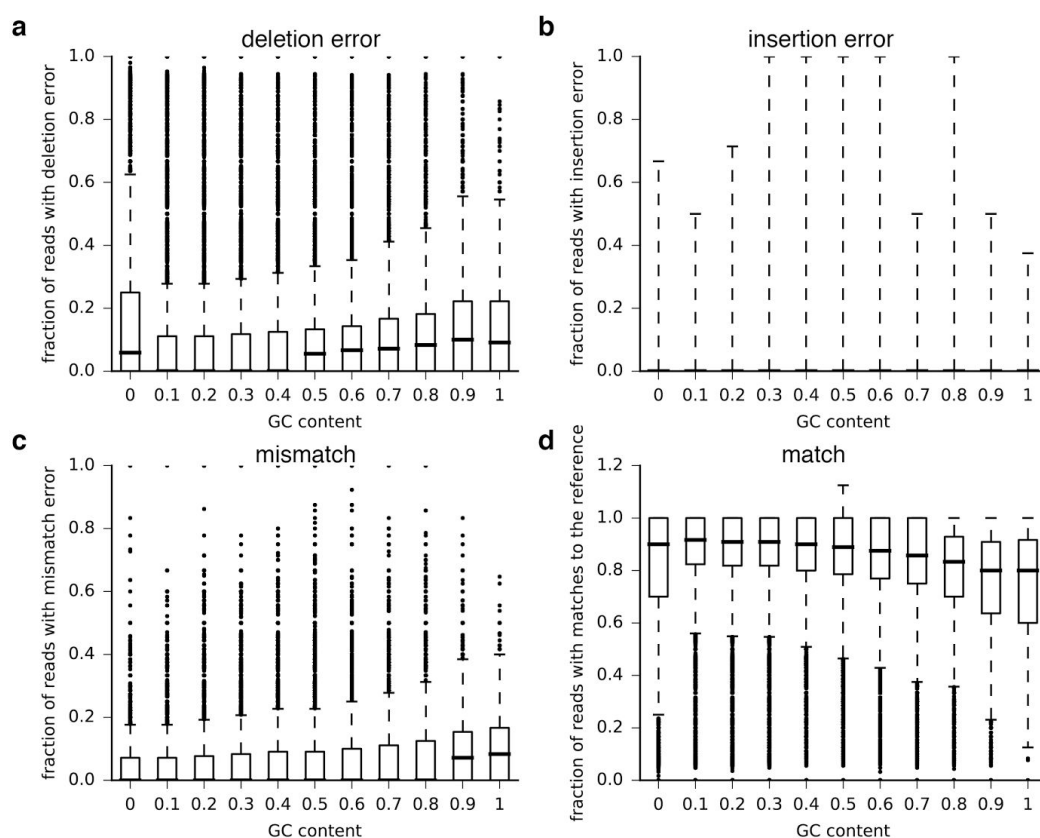

**Supplementary Figure 6. Genomic GC content versus error rate in R9.4 MinION sequencing data.**

A set of 1,064,470 randomly generated genomic positions (excluding polymorphic sites) were sampled from chromosome 1. For each of these positions the fraction of reads with deletion errors, insertion errors and mismatches was determined, based on MinION data from Patient2 (R9.4). In addition, the GC content of the reference genome was calculated based on a window of 10bp at each examined genomic position. **a** The fraction of deletion errors, **b** insertion errors, **c** mismatches and **d** matches to the reference genome are depicted (y-axis) as a function of genomic GC content (x-axis). For deletion errors, a linear regression model shows a statistically significant dependency of the error rate on the GC content ( $p < 10^{-16}$ ). The estimated coefficient, as change of error fraction per percent of GC-content, is 0.0072 (std. error = 0.0007).

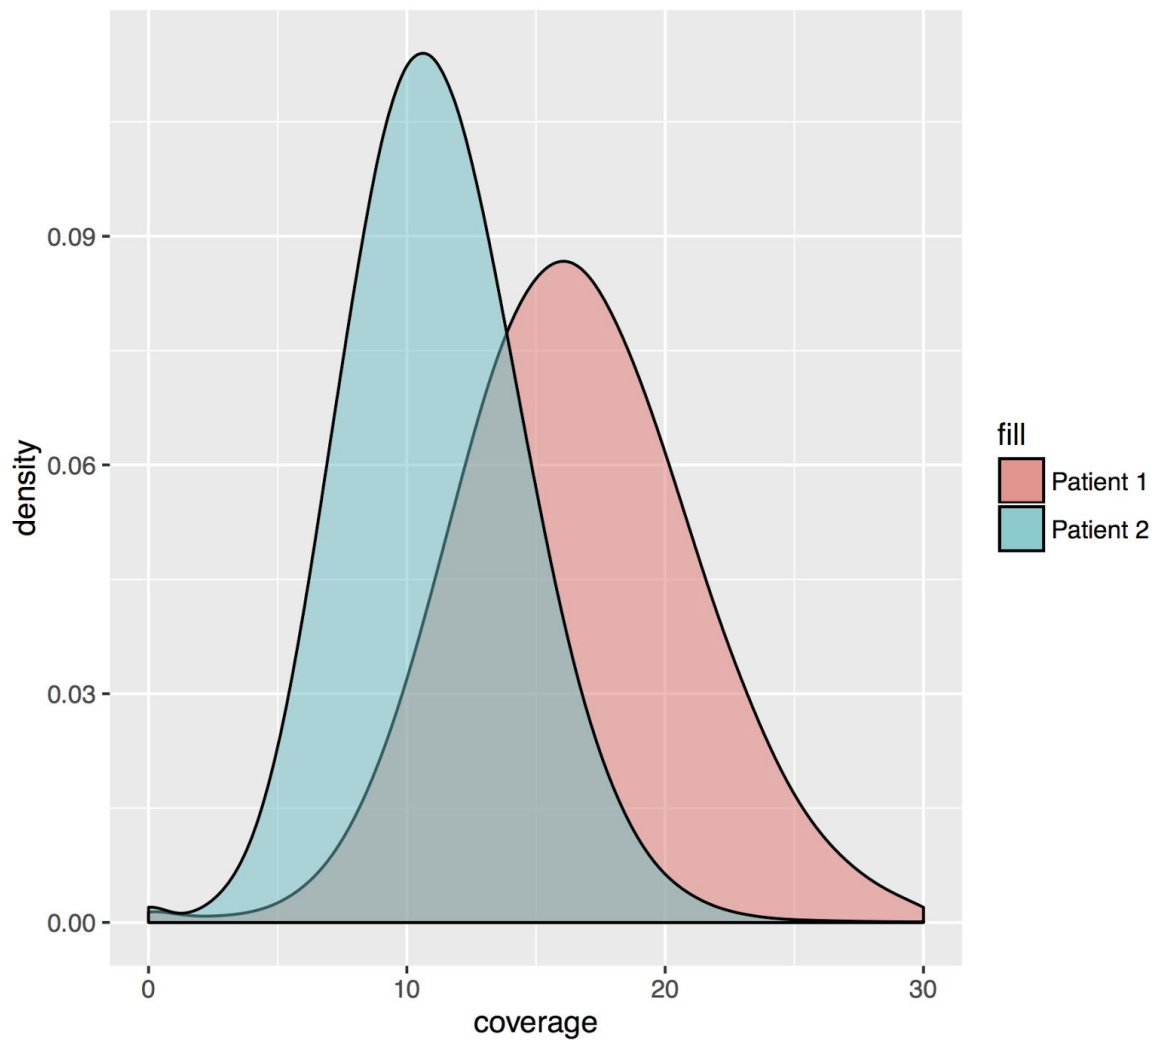

**Supplementary Figure 7. Coverage distribution for sequencing data from Patient1 and Patient2.**

Coverage distributions were generated by calculating the coverage for 1,000,000 random genomic positions, excluding positions in the gap table downloaded from the UCSC genome browser (GRCh37 gaps in golden path).



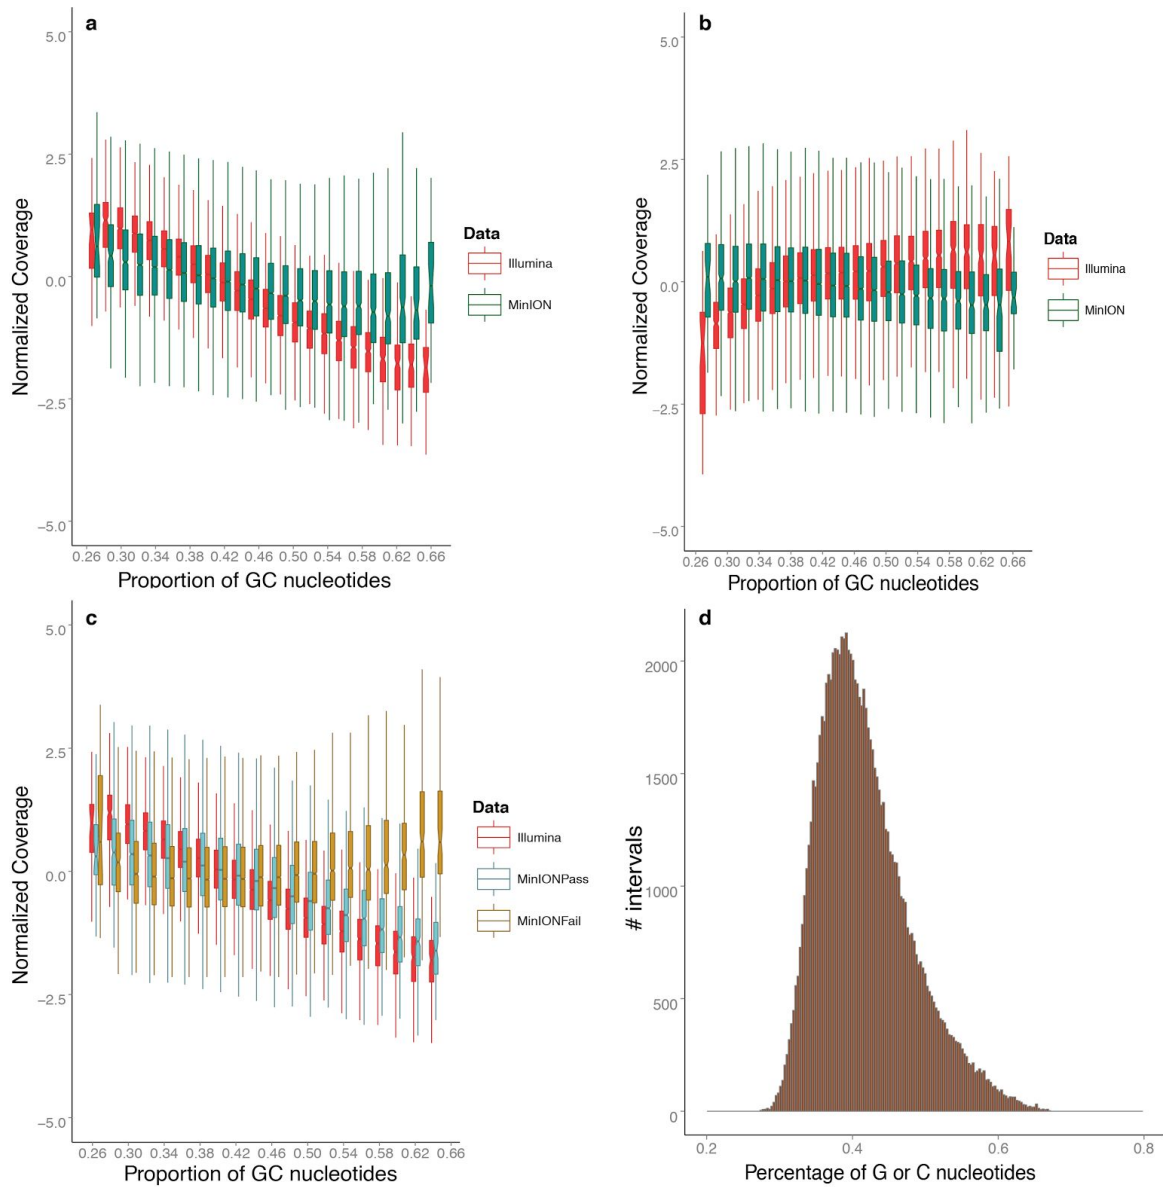

**Supplementary Figure 8. Average coverage distribution as a function of GC-content for MinION and Illumina sequencing data of Patient1 and Patient2.**

Panels **a** and **b** show statistics of depth of coverage for Illumina data (red) and MinION data (green) for Patient1 and Patient2 respectively. Panel **c** shows statistics of depth of coverage for Illumina data (red), MinION nanopore “pass” data (green) and MinION nanopore “fail” data (dark yellow) of Patient1. Panel **d** shows the GC content distribution across our randomly sampled intervals. The average coverages across 100,000 randomly sampled 5kb genomic intervals were used in each panel. Average coverage outliers, defined as 6 or more interquartile distances away from the median, were discarded for each technology respectively. The remaining data were normalized to  $N(0,1)$ , to account for different genome-wide sequencing average coverage and binned by GC-content. A linear regression model shows a statistically significant dependency of coverage depth on the GC content expressed as percentage, for both technologies ( $p < 10^{-16}$ ). The estimated coefficients, as number of standard deviations of change, per percentage of GC-content, are  $-0.094$  (std.

error = 0.0004) and -0.029 (std. error = 0.0004) for the Illumina and MinION data of Patient1 respectively (panel **a** non-binned data ). Conversely the estimated coefficients for Patient2 are 0.033 (std. error = 0.0004) and -0.018 (std. error = 0.0004) for the Illumina and MinION nanopore data respectively (panel **b** non-binned data).

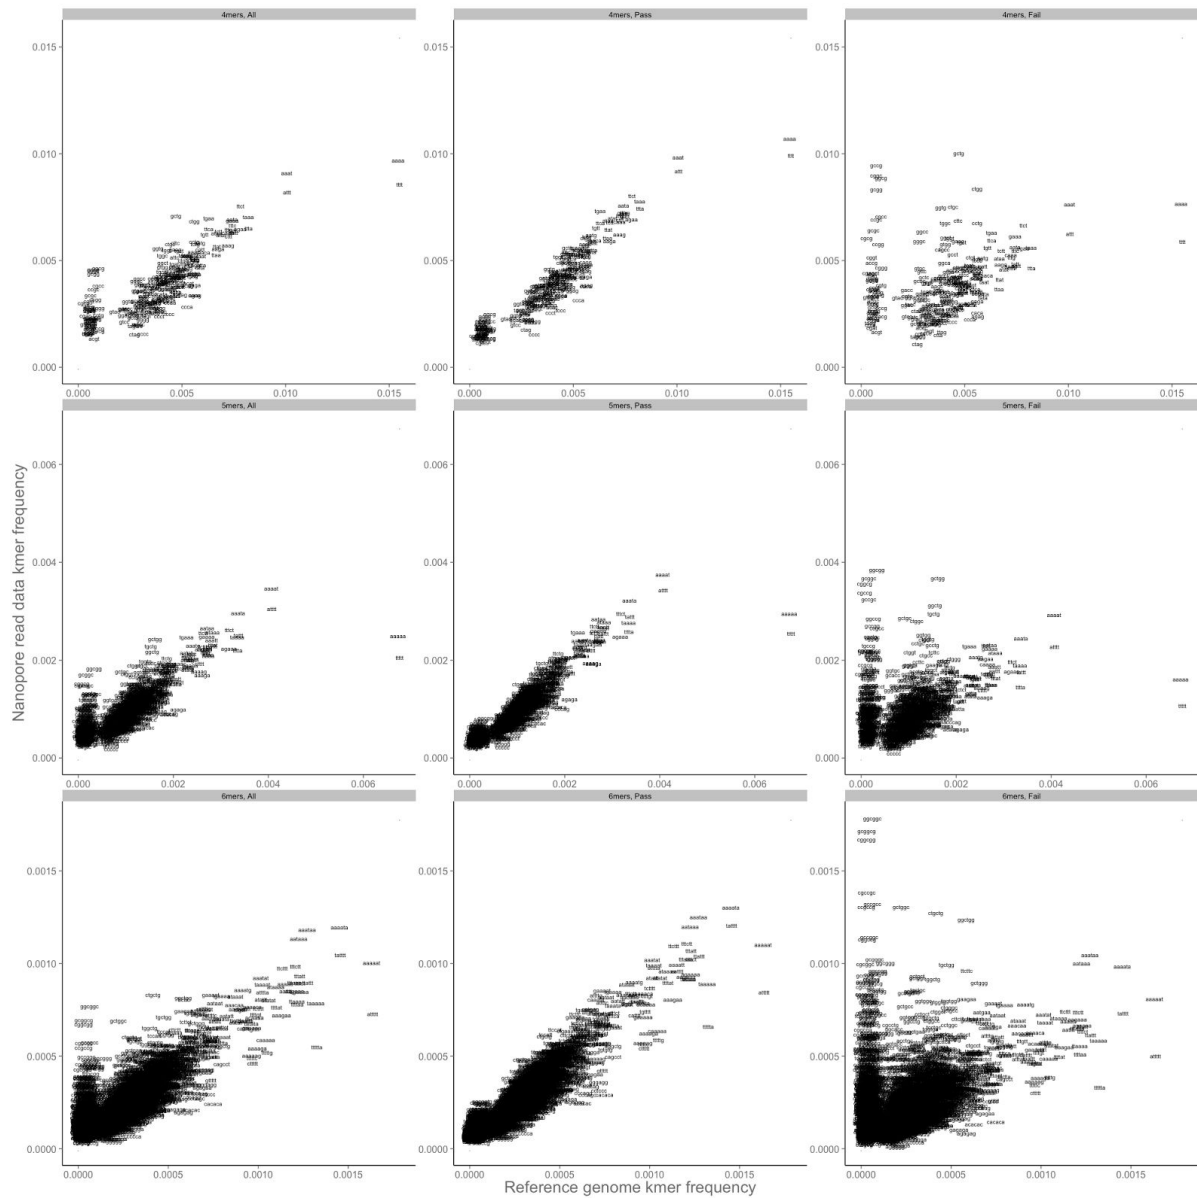

**Supplementary Figure 9. K-mer distribution in MinION sequencing data of Patient1.**

Plotted observed (MinION data) versus expected (GRCh37 reference genome) relative k-mer frequencies for 4-mers (**top**), 5-mers (**middle**) and 6-mers (**bottom**). The expected kmer frequencies are computed from the relative frequency of each kmer on the reference genome primary assembly for each k-mer size. The MinION data k-mer frequency was similarly computed, across all MinION reads, further stratified by “pass” (**middle**) or “fail” (**right**) read status. The “All” (**left**) represents the aggregate “pass” and “fail” MinION data.

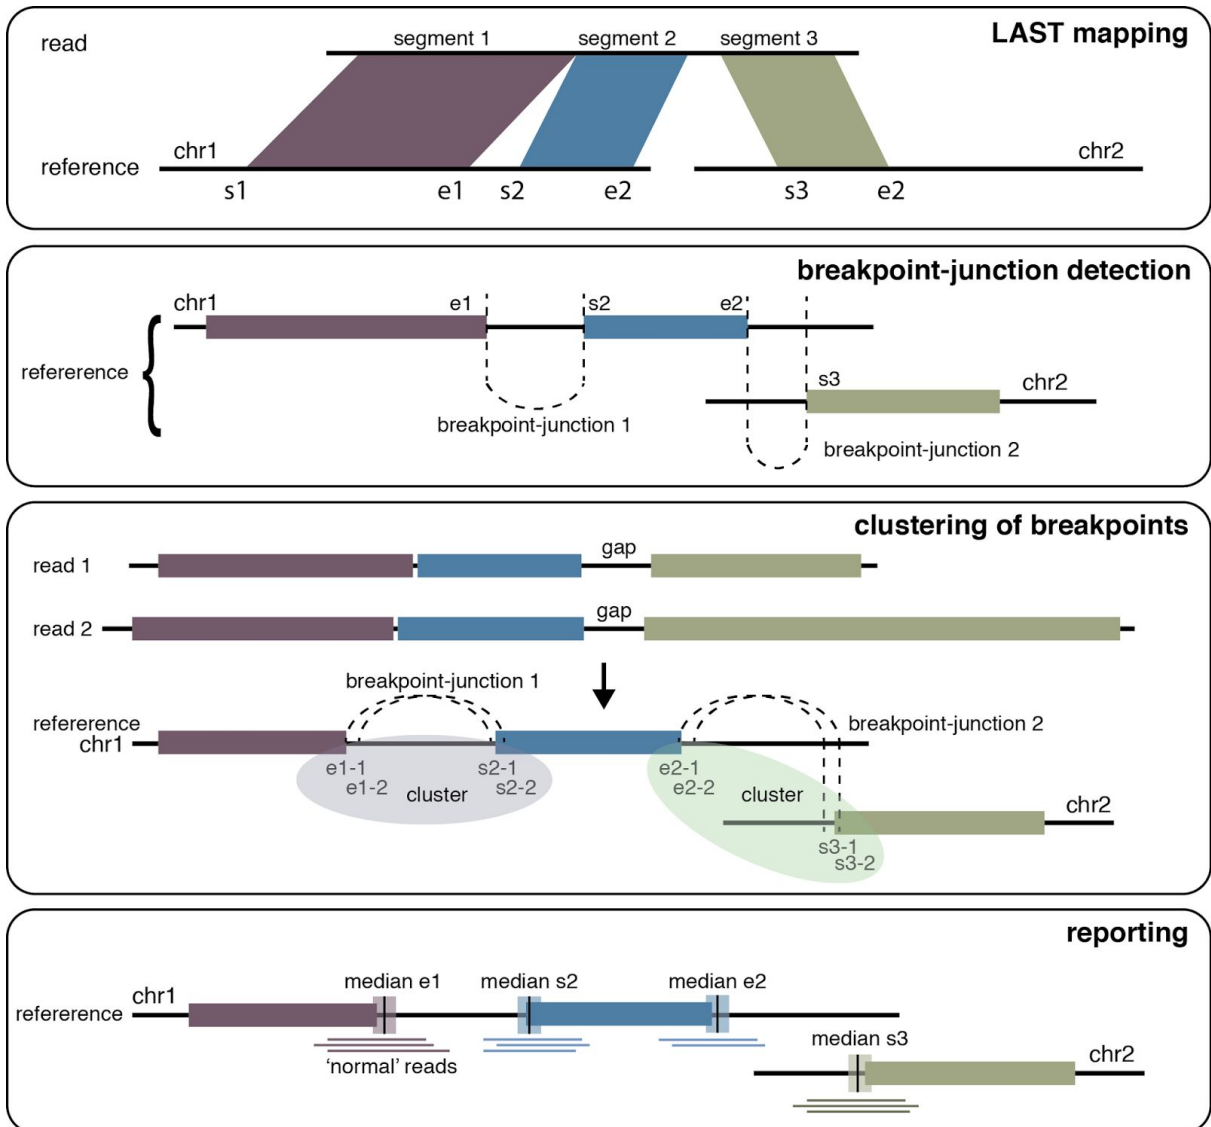

**Supplementary Figure 10. Overview of NanoSV algorithm.**

NanoSV uses LAST mapping output for discovery of SVs. In a first step candidate breakpoint junctions are detected using split read mappings. Candidate breakpoint junctions are subsequently clustered across multiple reads based on the overlap of junction coordinates and orientation. Clusters of breakpoint junctions are reported as SVs in VCF format. The tool is available on github: <https://github.com/mroosmalen/nanosv>.

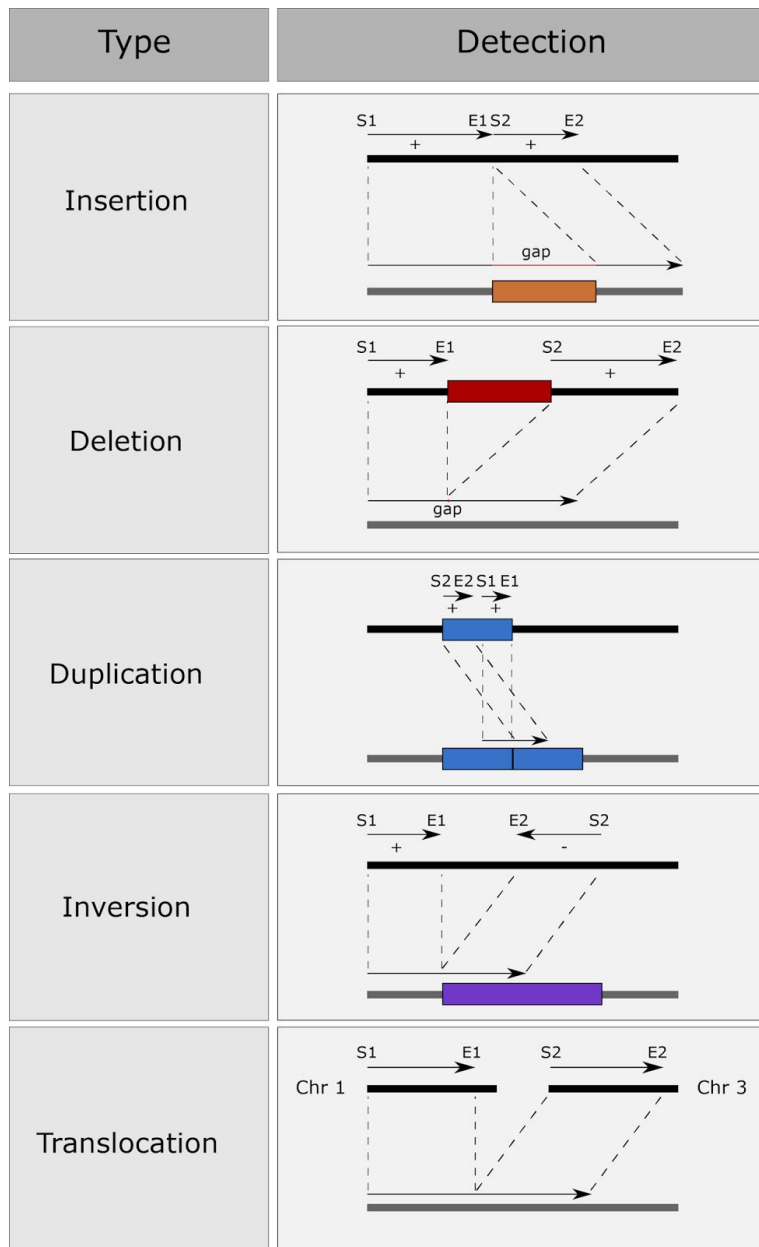

**Supplementary Figure 11. Detection of different SV types by NanoSV.**

NanoSV detects most types of breakpoints junctions with the exception of insertions consisting of unmapped repeat elements which are longer than the nanopore read lengths, e.g. LINE insertions may be missed if the read length falls below the typical length of LINE elements (~6kb). Genomic coordinates of mapped segments are indicated by  $s1/s2$  (start of segments) and  $e1/e2$  (end of segments). Gaps within reads represent unmapped segments, which may result from repeat insertions or complex variations. Deletions are discerned from insertions if the gap length is smaller than the distance between the joined genomic positions ( $s2-e1$  which represents SV size for variants other than insertions).

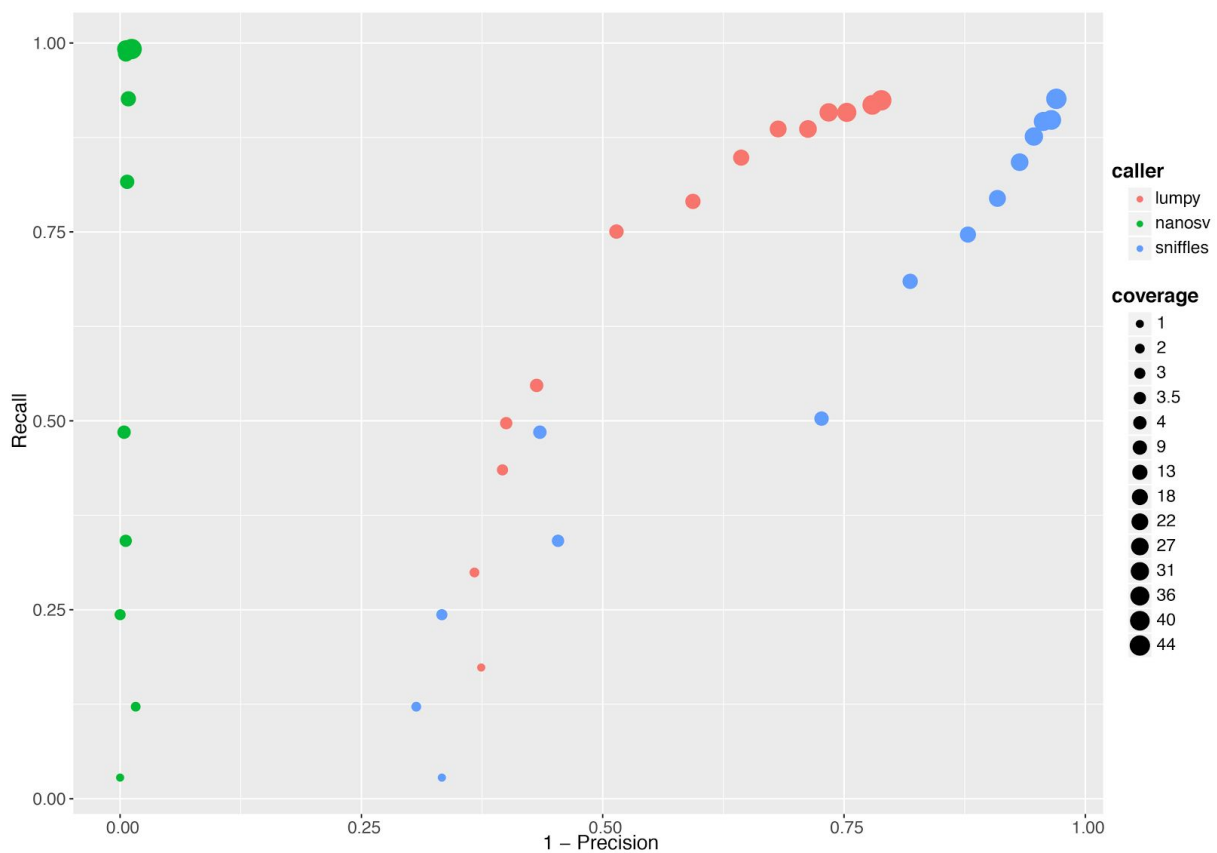

**Supplementary Figure 12. Recall-precision curve for SV calling performance on simulated nanopore data.**

Breakpoints (501) were simulated on reference chr1 and based on the resulting chromosomal sequence nanopore reads were simulated using NanoSim<sup>1</sup>. SV calling using Lumpy<sup>2</sup>, Sniffles<sup>3</sup> and NanoSV was performed on subsets of the simulated nanopore reads to estimate the effect of read coverage. The recall (true positives/true positives + false negatives) and precision (true positives/true positives + false positives) was calculated for each call set, without any additional post-calling filters being applied.

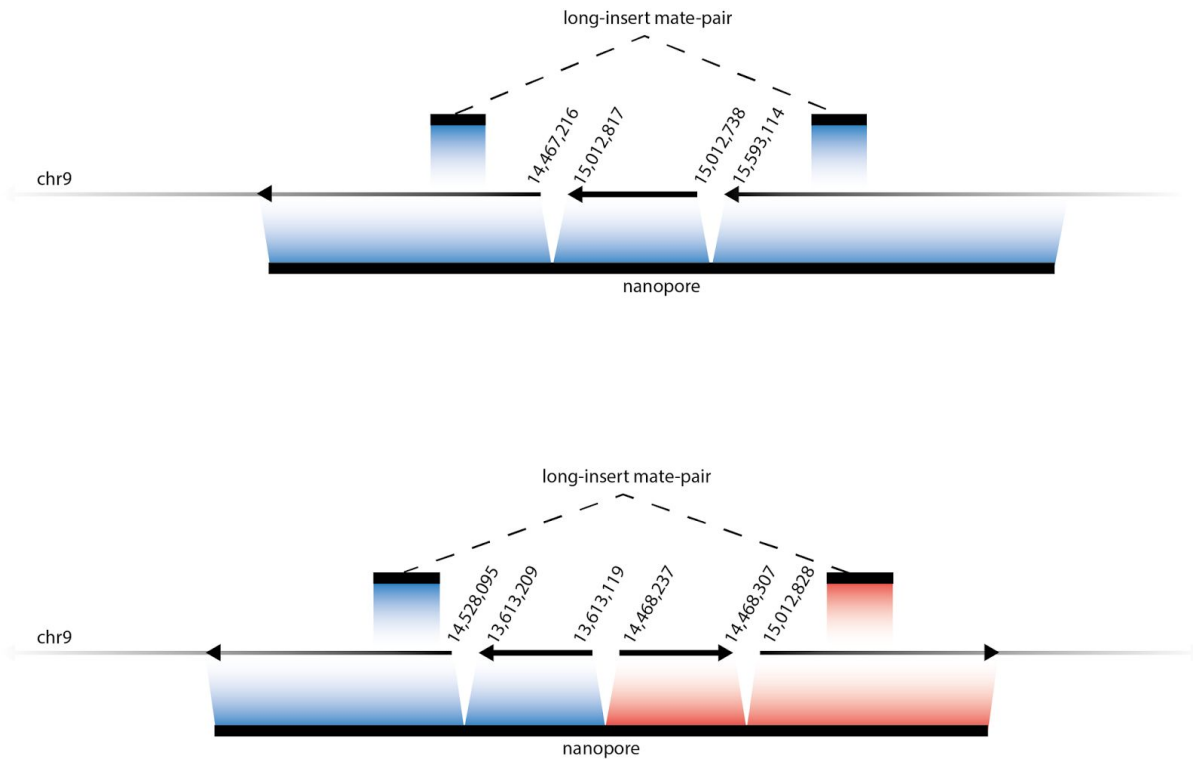

**Supplementary Figure 13. Structure of two complex breakpoint-junctions in Patient2 chromothripsis.**

Long-insert mate-pair sequencing was previously used to study the chromothripsis in Patient2<sup>4</sup>. The long-insert size of these mate-pair libraries hampers detection of short chromosomal segments, because the short sequence reads can jump over the short segments and only reveal the connection between the segments flanking these short segments. In the upper panel, an 80bp segment from chr9 is depicted, which was identified using nanopore reads and confirmed by Sanger sequencing. The lower panel highlights two adjacent short genomic segments - both from chr9 - that were missed by the long-insert mate-pair sequencing, but detected by nanopore reads and subsequent PCR and Sanger sequencing.

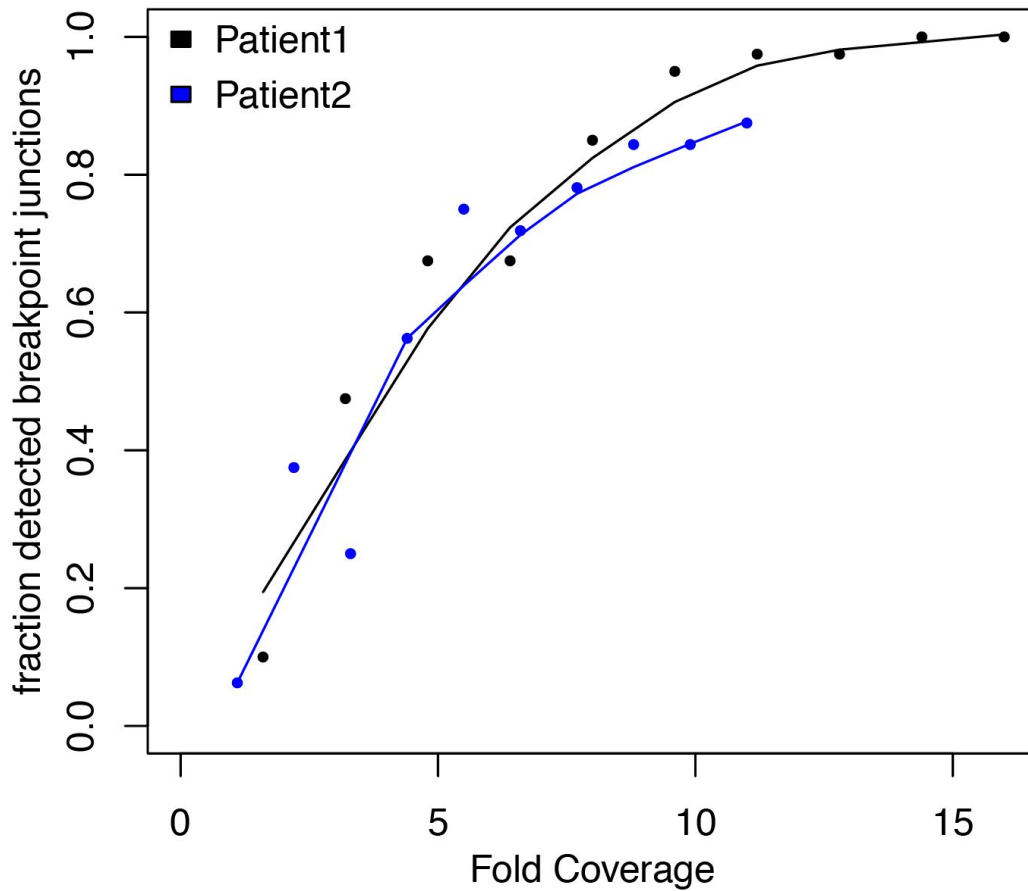

**Supplementary Figure 14. The effect of subsampling the MinION sequencing data on chromothripsis breakpoint-junction detection.**

Nanopore sequencing reads were subsampled from 10% to 90% of the original data and each subsampled dataset was analyzed using NanoSV to determine the fraction of known chromothriptic breakpoint-junctions that could be detected. Below a coverage of ~14x (Patient1), the fraction of detected breakpoint junctions drops below 1.



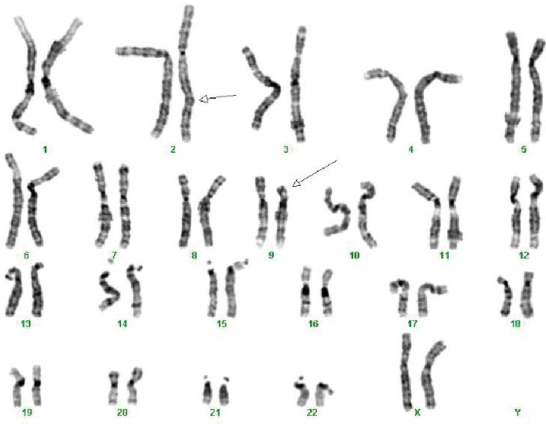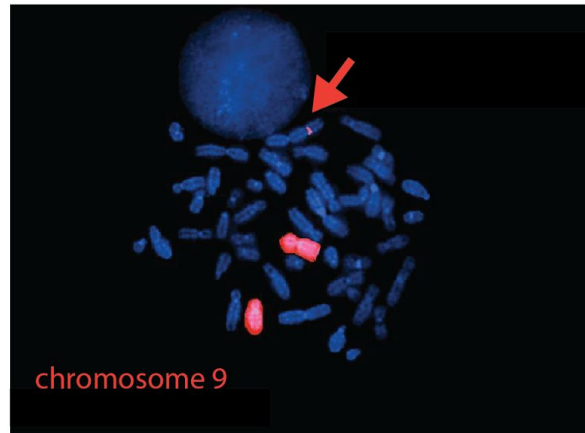

**Supplementary Figure 15. Karyotype and chromosome 9 painting derived from Patient1 chromosome spreads.**

Left panel shows the patient karyotype. Arrows indicate chromosome 2 and chromosome 9. The right panel displays a chromosome 9 paint (red) demonstrating an insertion of a part of chromosome 9 into chromosome 2 (arrow).

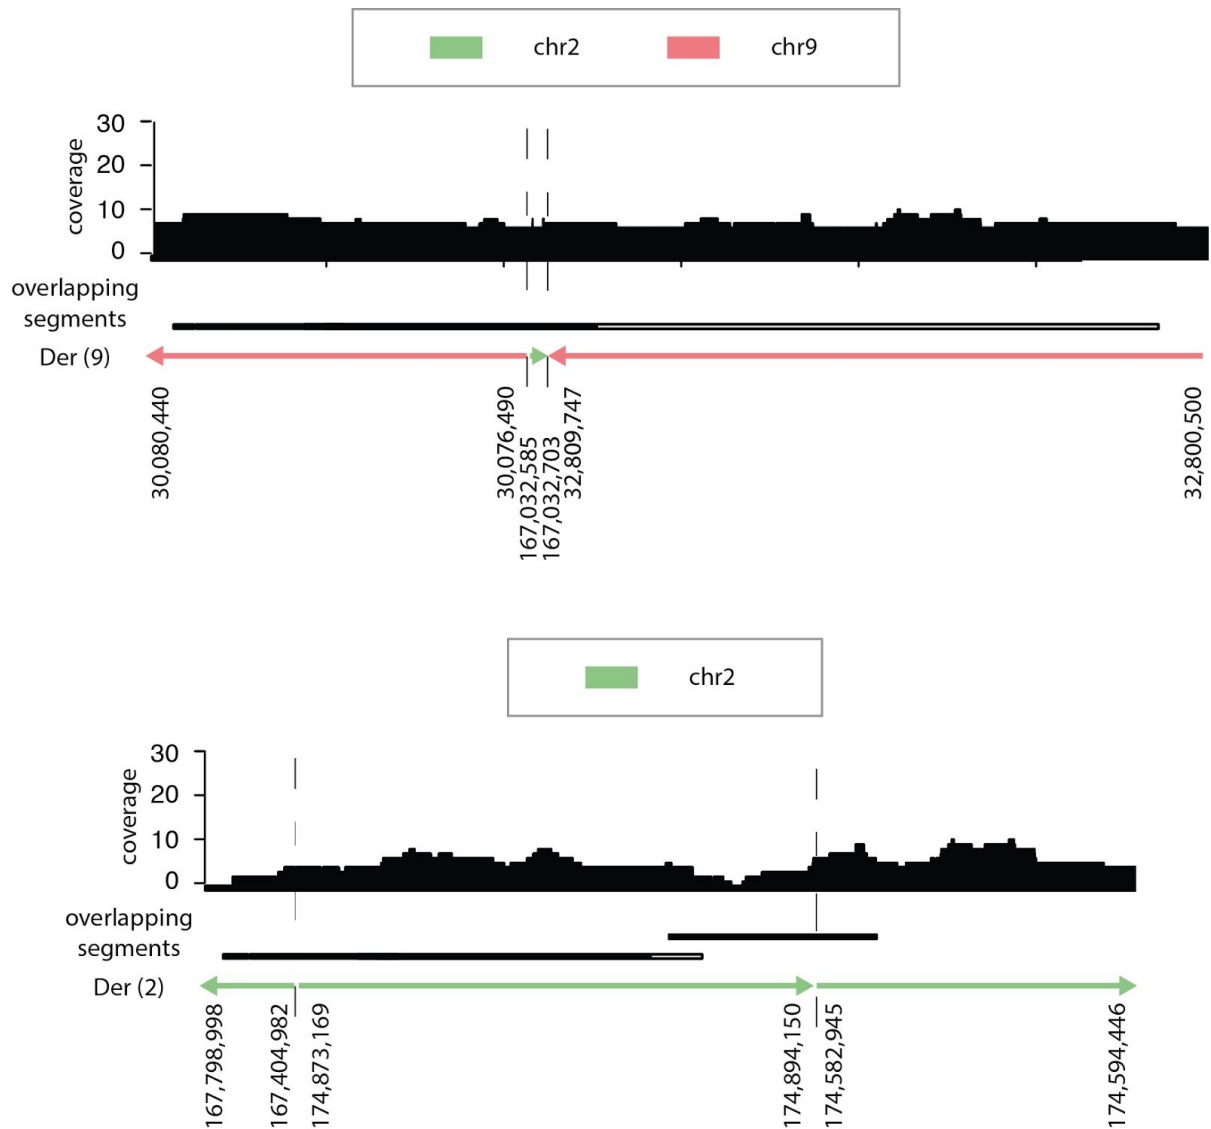

**Supplementary Figure 16. Reference-assisted assembly of chromothripsis regions in Patient1.**

Order and orientation of chromosomal regions involved in the chromothripsis rearrangements of Patient1 is depicted by colored lines with arrowheads. The resulting chromosomal configuration is based on overlapping nanopore reads derived from the paternal haplotype of Patient1. Nanopore reads that are instrumental for segment connectivity are indicated by black bars. The coverage track has been generated from all paternal reads mapping to the respective chromosomal segments. The order and orientation of the joined chromosomal segments matches the chromothripsis structure that is described in **Figure 3**.

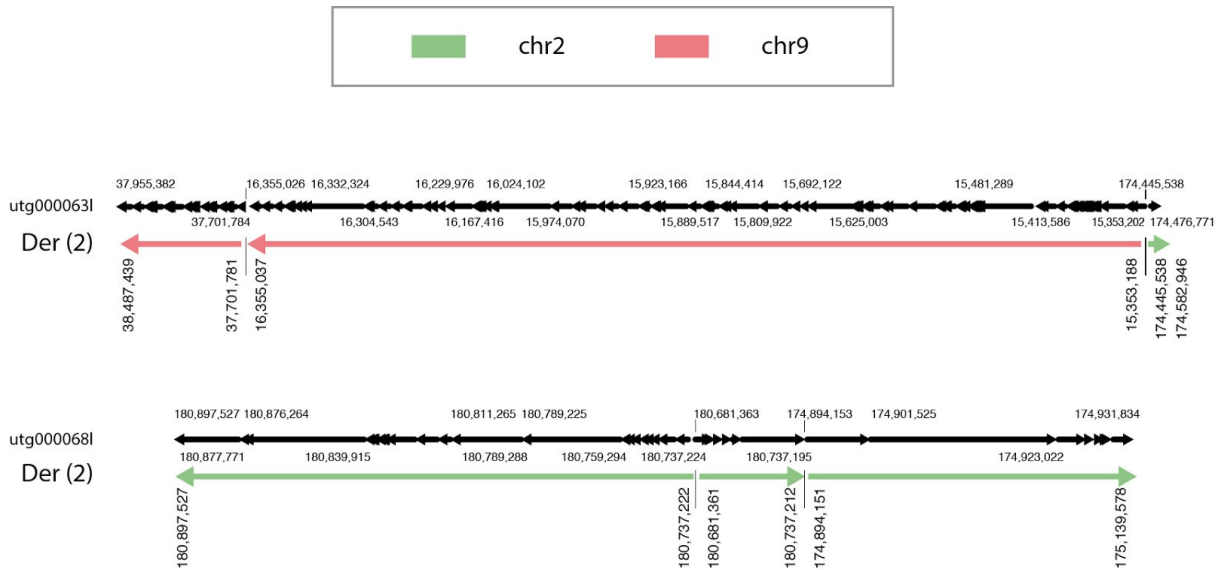

**Supplementary Figure 17. Contig structure produced by Miniasm assembly of chromothripsis regions in Patient1.**

Order and orientation of chromosomal regions involved in the chromothripsis rearrangements of Patient1 is depicted by colored lines with arrowheads and was obtained as for **Figure 3**. The structure for two chromothriptic regions, containing three genomic segments each, was supported by contiguous sequences (contigs) resulting from Miniasm<sup>5</sup> assembly of nanopore reads, excluding reads that were assigned to the maternal haplotype. Both contigs (utg000068l and utg000063l) support part of the structure of derivative chromosome 2. The black arrows indicate the positions and orientations of contig segments mapped to the human reference genome (GRCh37).



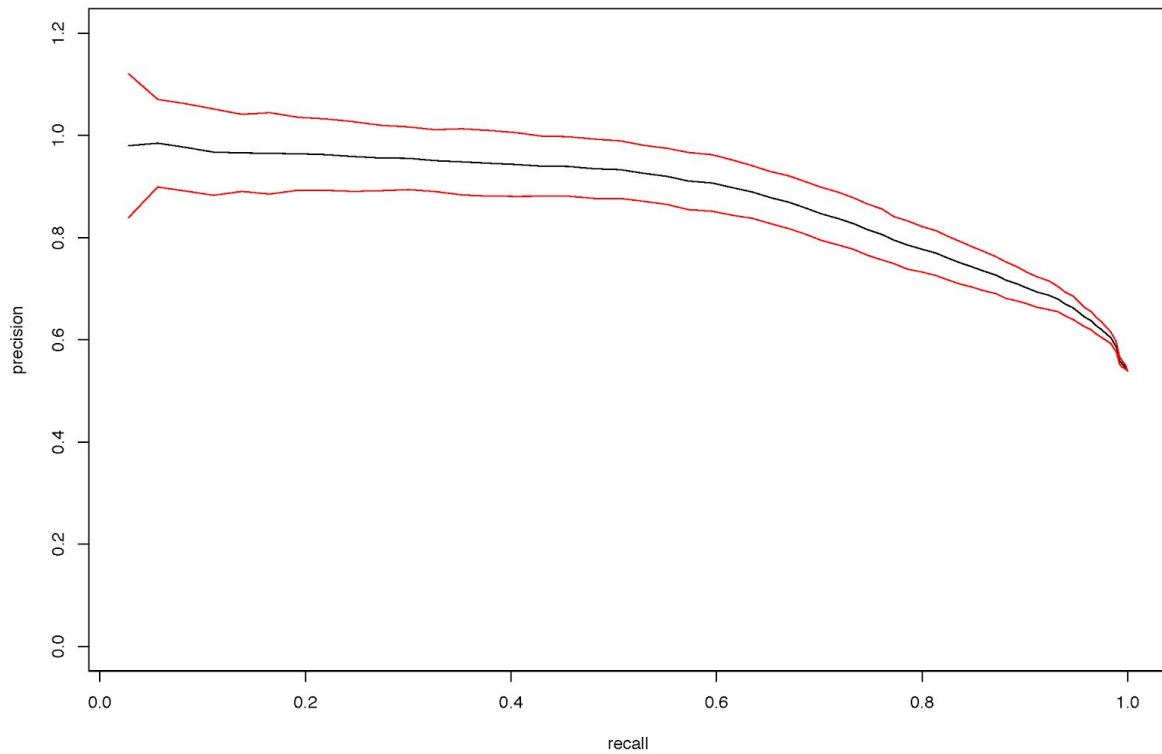

**Supplementary Figure 19. Recall-precision curve obtained from training and cross-validation on NanoSV SV calls.**

The illustrated ROC curve is obtained from 100 cross-validation random forest training runs (split 90%-10% for training-testing) from the total set of 354 true positive and 300 true negative SVs from the NA12878 sample. The chosen, optimal operating point has a precision of 82% at a recall rate of 75%.

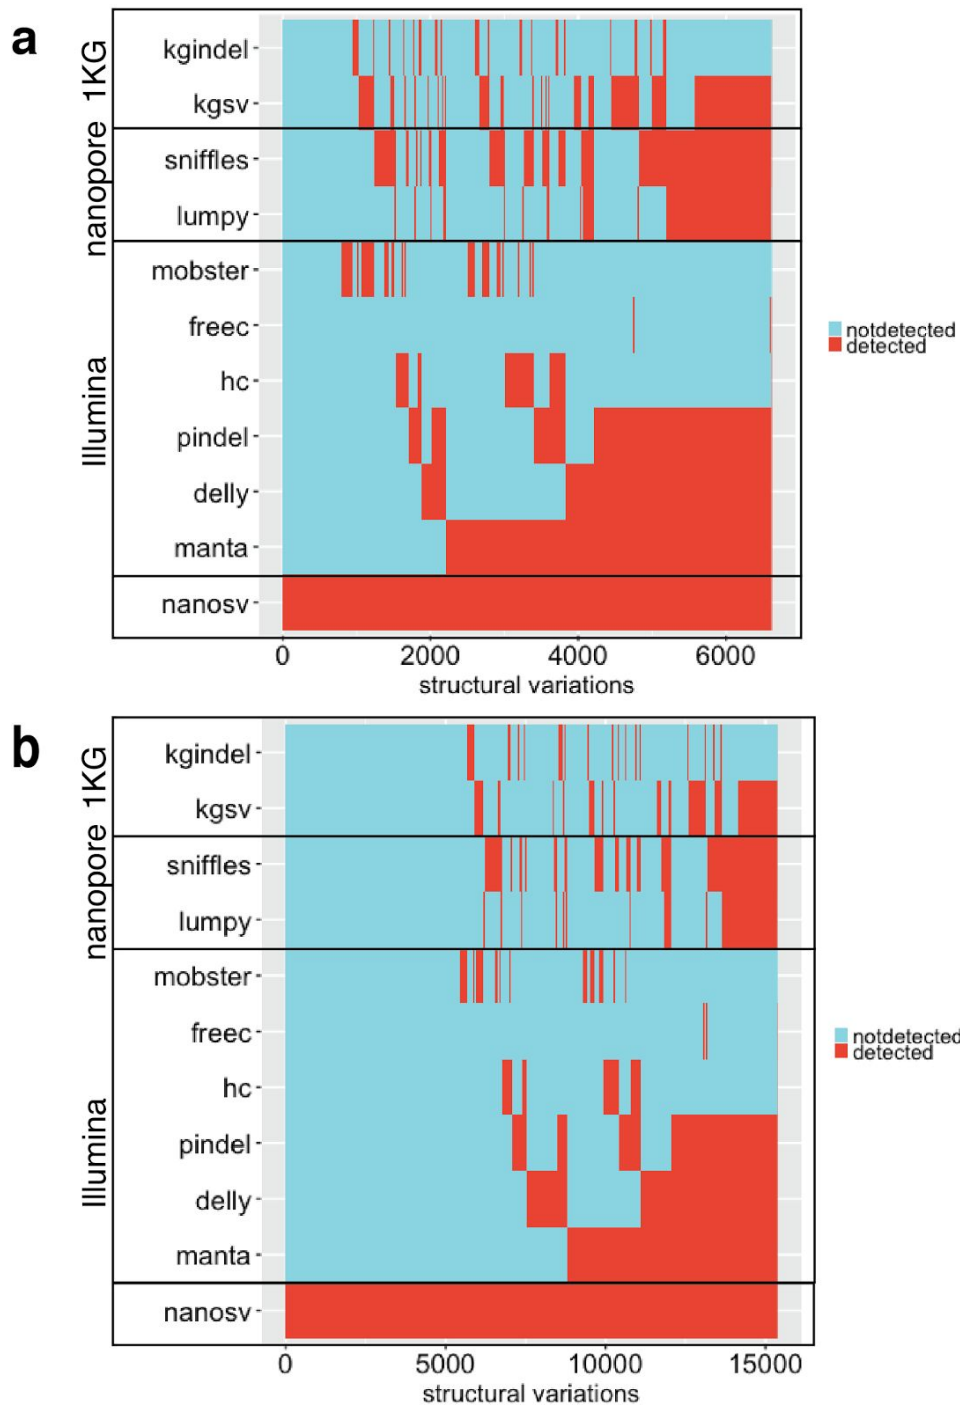

**Supplementary Figure 20. Heatmap showing the overlap of SV calls between different callers and SV datasets.**

We used the NanoSV SV call set of Patient1 and Patient2 as a basis for intersection with SV call sets generated from Illumina data, using six different tools. Additionally, we used two tools for detection of SVs in the Nanopore data from Patient1 and Patient2. Finally, we intersected the NanoSV calls with the 1000 Genomes phase 3 consensus calls<sup>6</sup>. **a** Heatmap showing overlaps of 6,616 NanoSV SVs predicted as true positive by a random forest classifier (**Methods**). **b** Heatmap showing overlaps of the initial call set consisting of 15,369 candidate NanoSV SVs, following filtering for SVs that overlap homopolymers and tandem repeats (**Methods**).

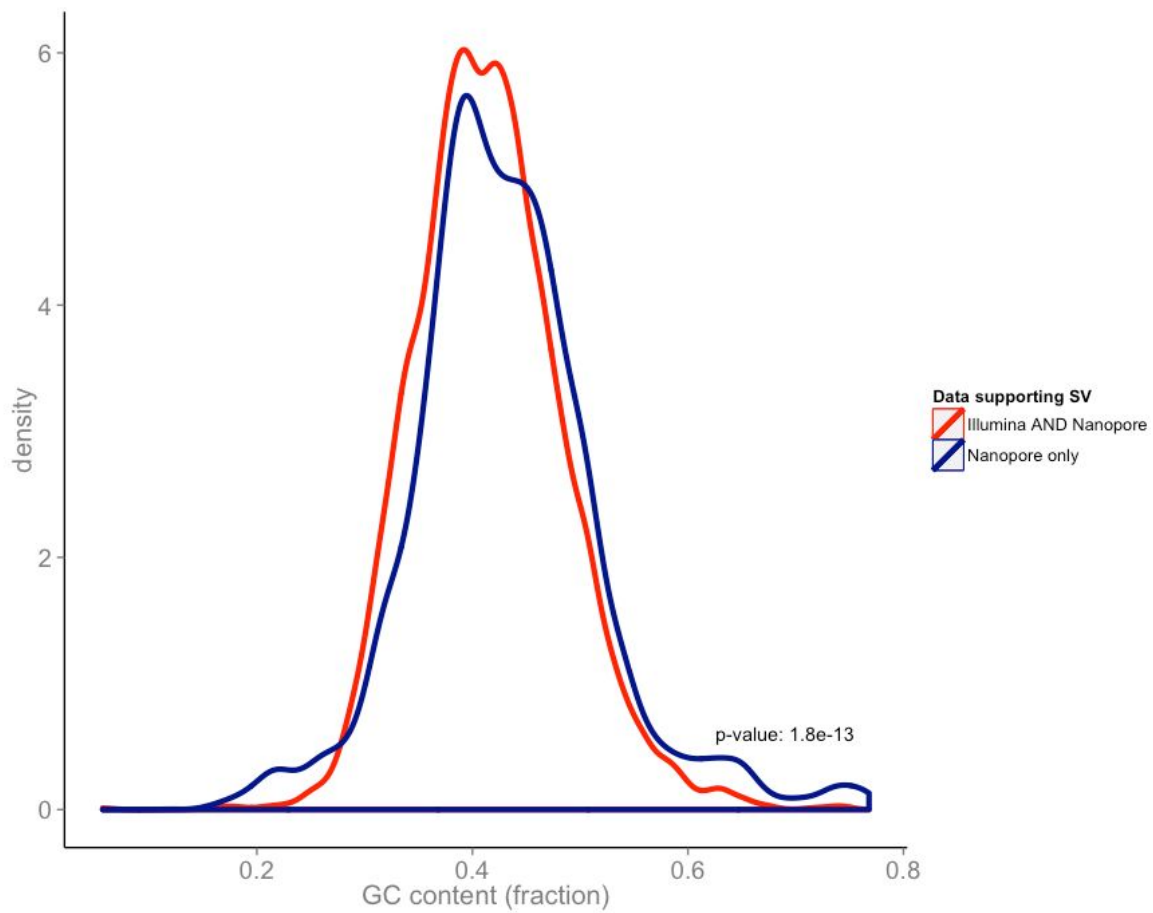

**Supplementary Figure 21. GC bias of nanopore specific SVs.**

GC content distributions across 500 base-pair windows around the high confidence set of SV calls that are detected in both Illumina and MinION nanopore data (red) and nanopore data only (blue). The average GC content in the regions where an SV is detected only in the nanopore data is 1.4% higher than the the average GC content where an SV is detected in both Illumina and MinION nanopore data (Welch two sample t-test: p-value = 1.8e-13, 95% CI = 1.0 - 1.8).

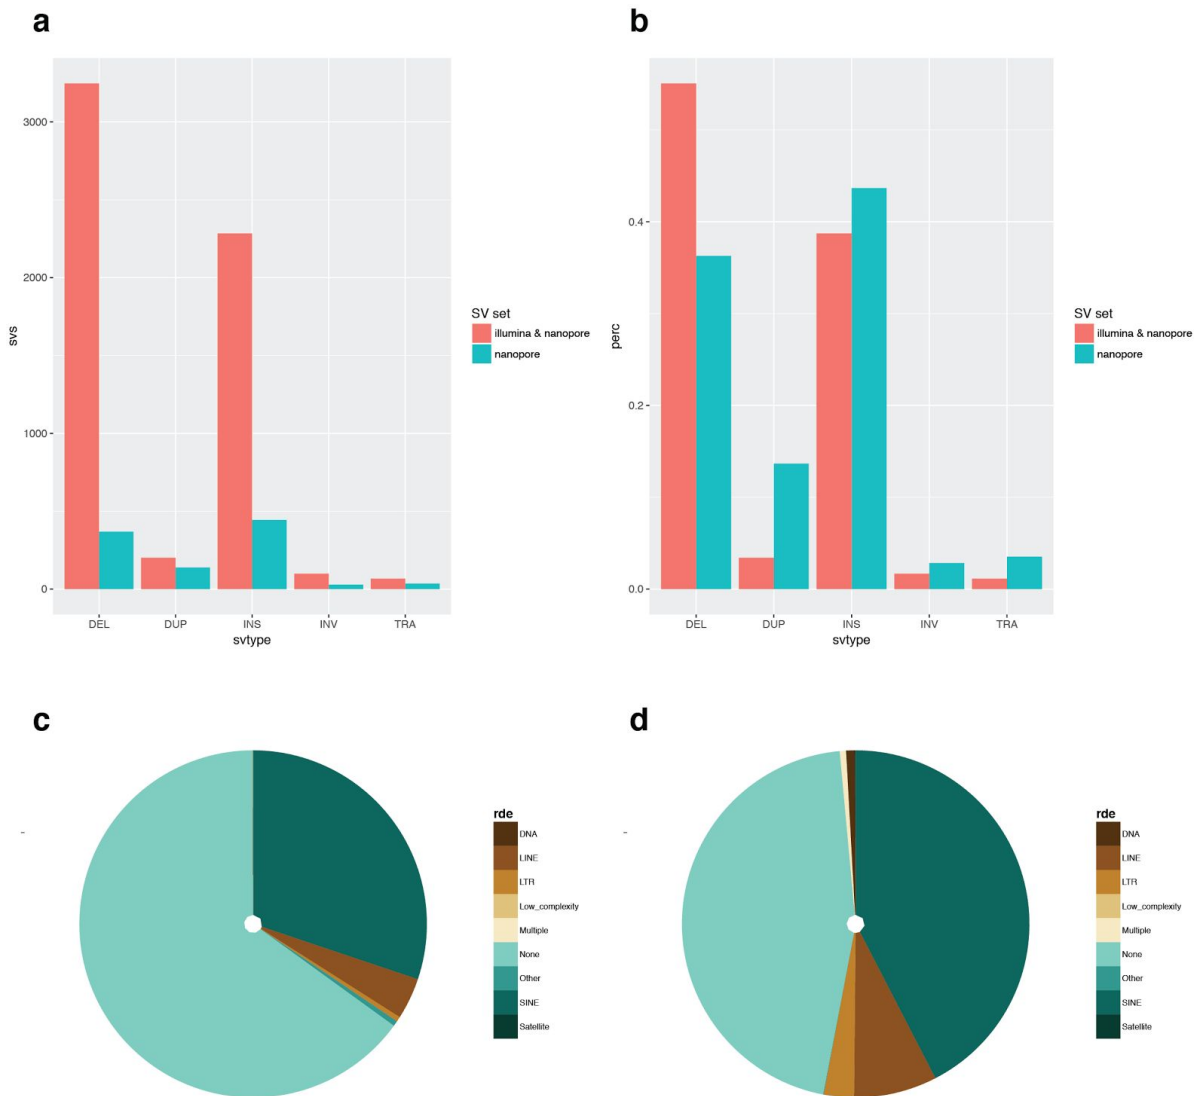

**Supplementary Figure 22. Patient1 and Patient2 cumulative distributions of SVs.**

We plotted numbers of SV calls across SV types (**a** and **b**) and across SV annotations (**c** and **d**), after random forest filtering. **a** shows the histogram of SV type across both patients, subsetted for the “illumina and nanopore” data and “nanopore” only data. **b** shows the SV type distribution for the same subsets as **a**. **c** shows the annotations distribution, by class, for all deletions detected in both nanopore and Illumina data. **d** shows the annotations distribution, by class, for all insertions detected in both nanopore and Illumina data.



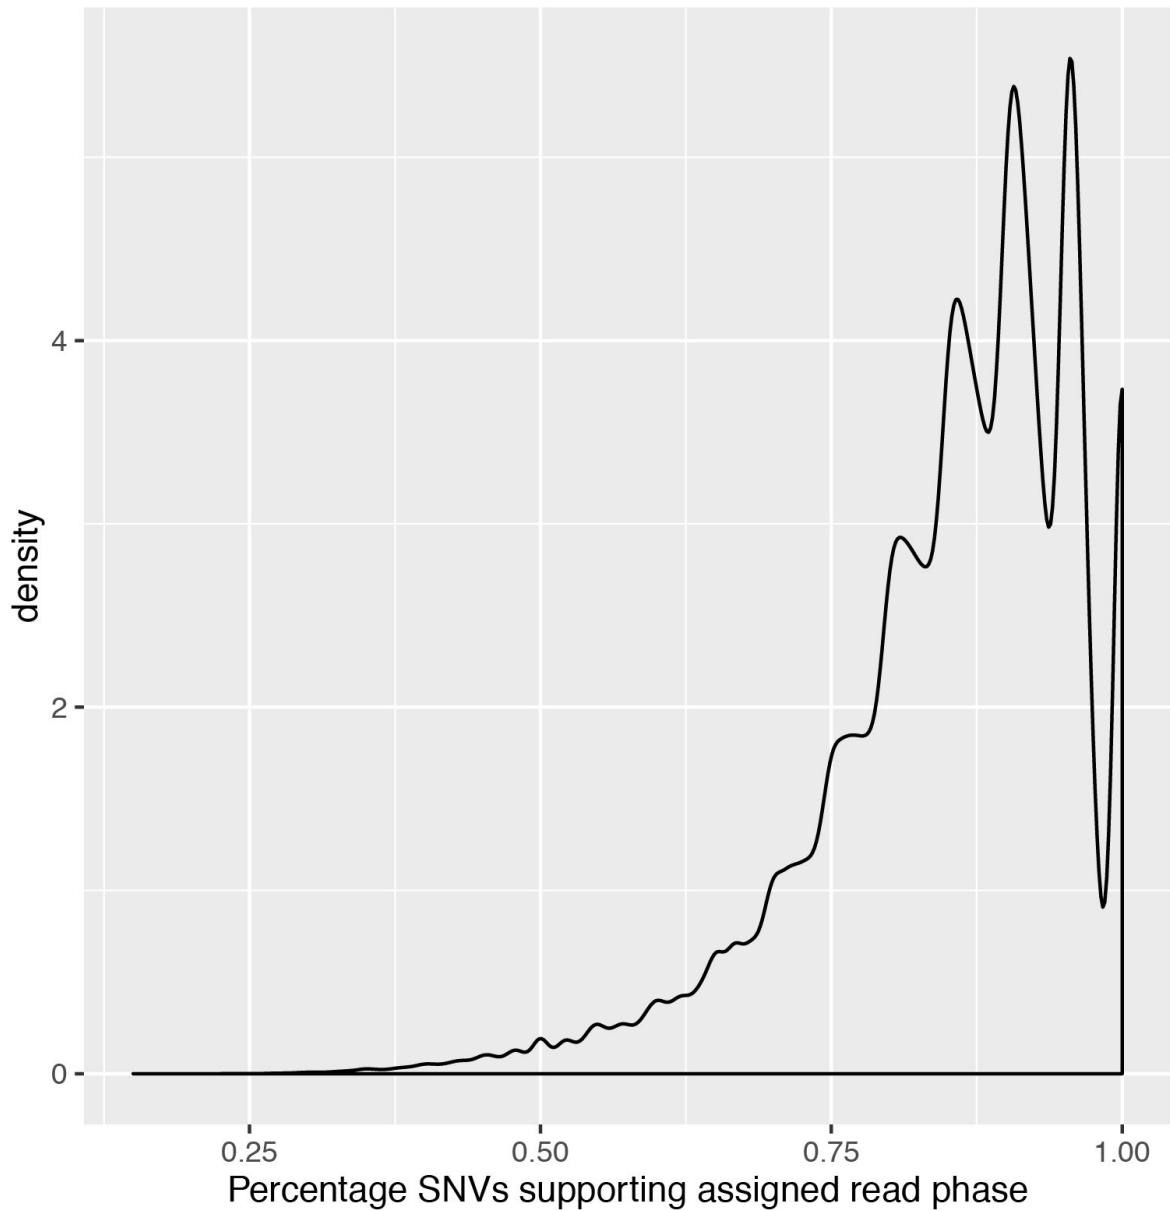

**Supplementary Figure 23. Nanopore read phase support.**

The plot show the distribution (density) of the percentage  $p$  of SNVs per read supporting the read phase of each nanopore read covering at least 20 phase-informative SNVs. The percentage  $p$  is defined as  $\text{SNV}_{\text{supp}}/\text{SNV}_{\text{total}}$ , where  $\text{SNV}_{\text{supp}}$  is the number of phase-informative SNVs that support the read phase and  $\text{SNV}_{\text{total}}$  is the total number of phase-informative SNVs covered by the nanopore read.

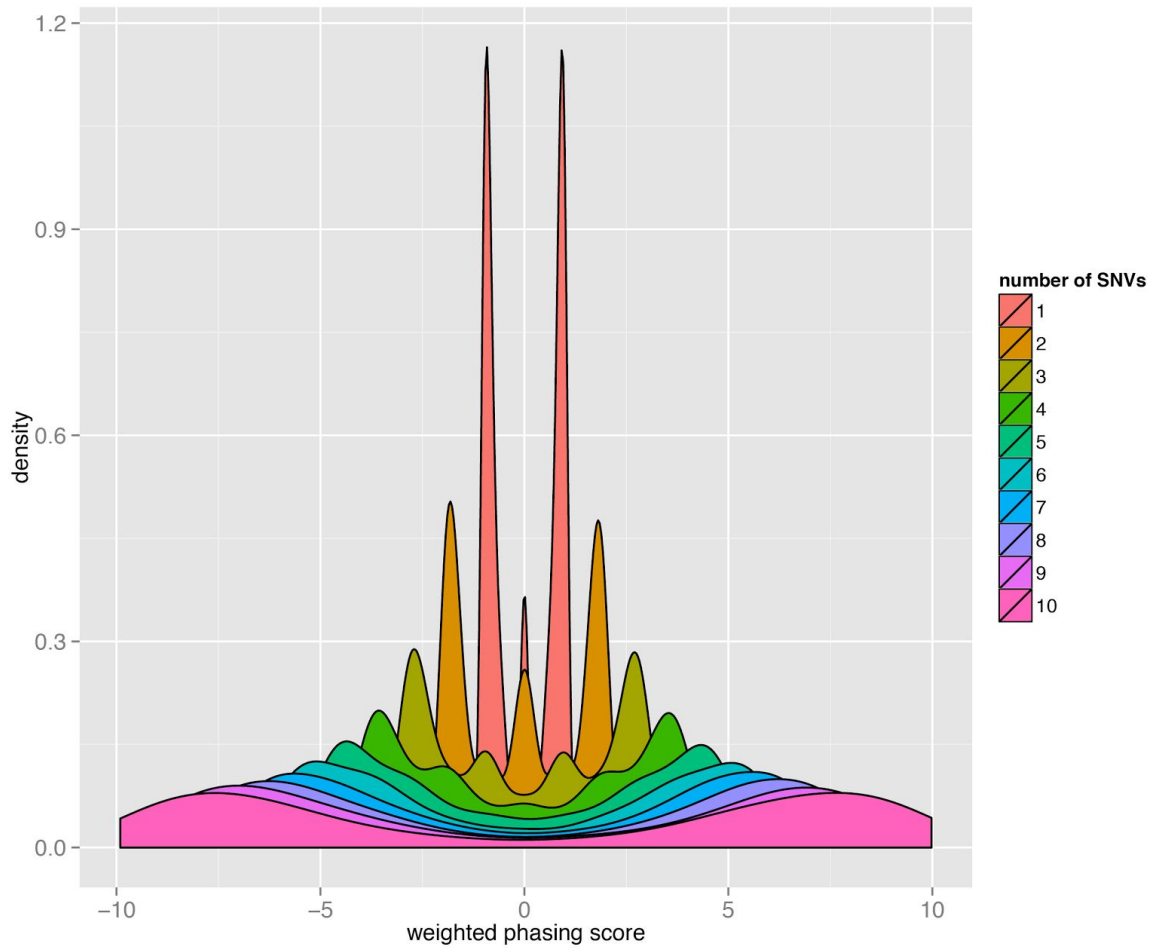

**Supplementary Figure 24. Phasing-score distribution for nanopore reads from Patient1.**

For each nanopore read a phasing-score  $S$  was calculated (x-axis, Methods). The plot shows the distribution of phasing scores ( $S$ ) for nanopore reads overlapping 1 to 10 phase-informative SNVs. If the phasing score  $S$  is positive, the read is assigned to the paternal haplotype, while for a negative value of  $S$  the read is assigned to the maternal haplotype.

**a**

Read: 0e197afa-0a02-4180-b995-91cb4e23a54e\_Basecall\_2D\_2d

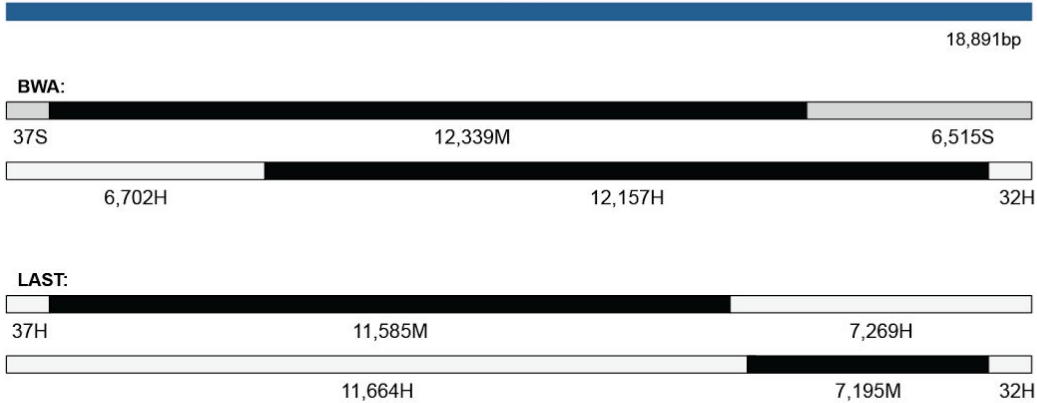

**b**

Read: 2644523a-5074-47da-8ab3-09ee73d7ba23\_Basecall\_2D\_2d

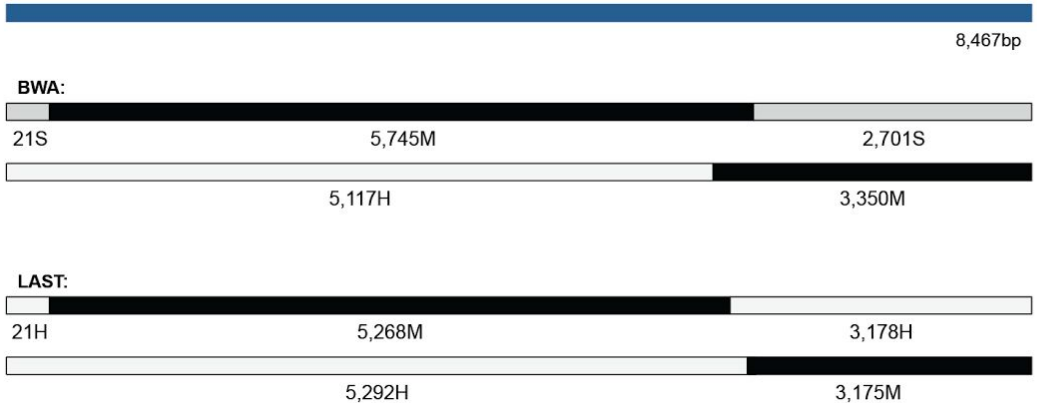

**Supplementary Figure 25. Alignment differences between BWA MEM and LAST.**

Two examples (**a** and **b**) of how BWA and LAST segment the same read differently at alignment. Each whole read is depicted in blue. For each caller, the two grey/black lines depict how the read is split into two segments at alignment. The black line depicts the part of the read that is aligned and the grey parts depict the clipped parts of the read, for each segment respectively. Both these examples show how bwa splits reads into (at least slightly) overlapping segments, which impair our ability to evaluate candidate breakpoints. Only the read from example **b** contributes to a non HOM\_REF SV call in our dataset.

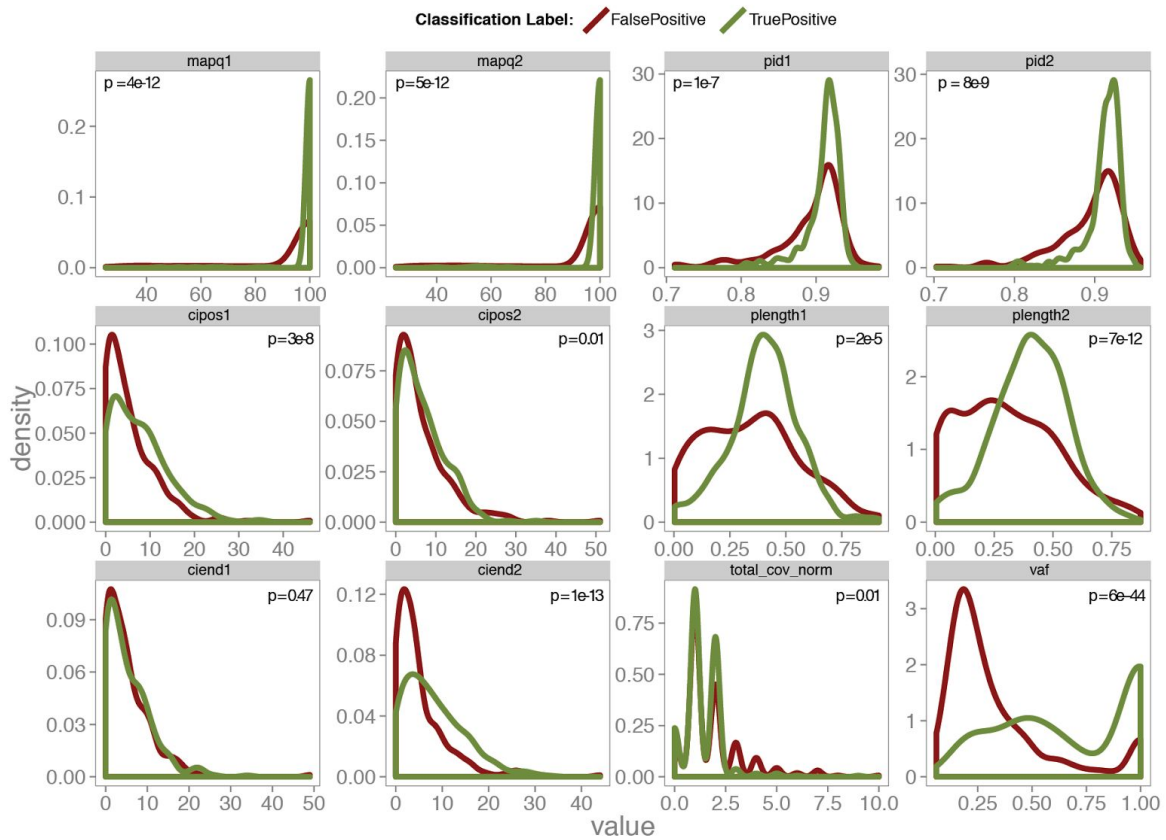

**Supplementary Figure 26. Distribution of random forest feature values in the NA12878 data.**

Distribution of random forest feature values, within the NA12878 training data, for true positives (green) and false positives (red) respectively. P-values are derived from a two-sided unpaired wilcoxon test.

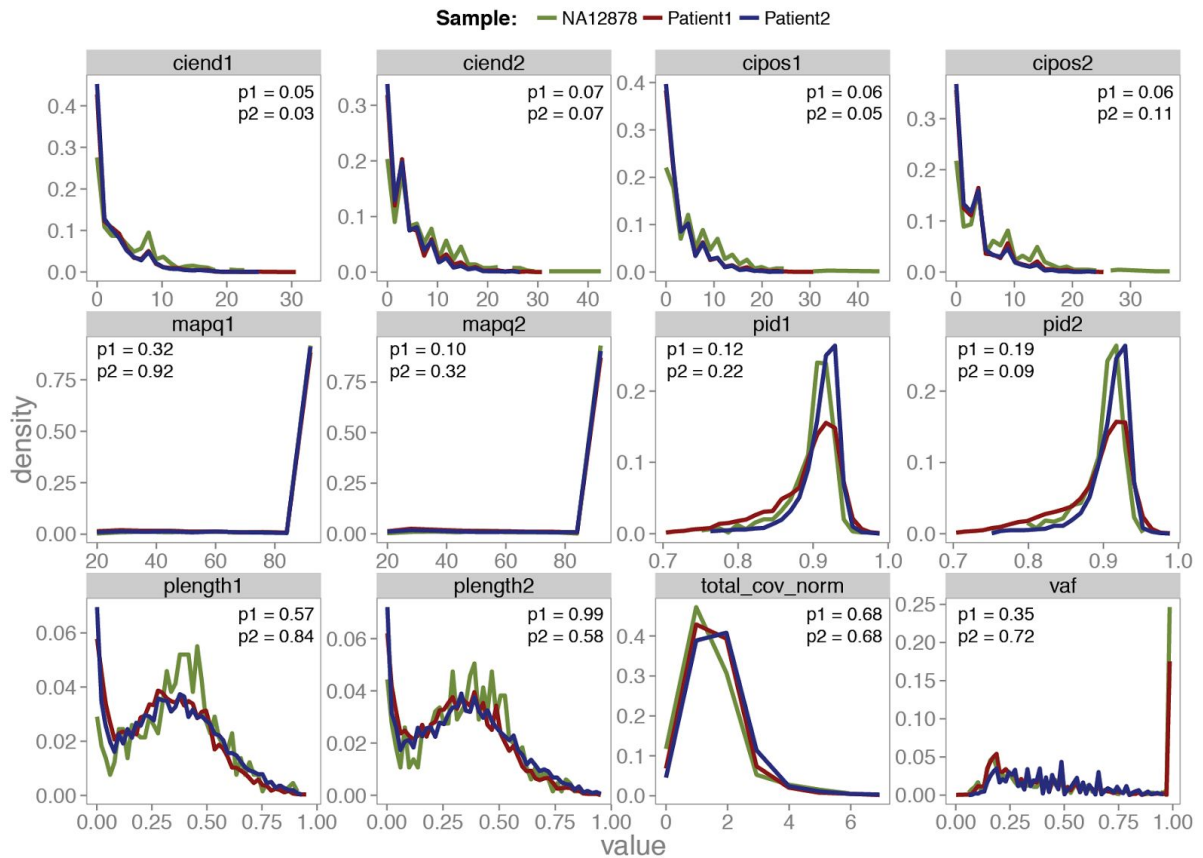

**Supplementary Figure 27. Distribution of random forest feature values across samples.**

Distribution of random forest feature values across all SV calls (after filtering for homopolymers and simple repeats) within NA12878 (green), Patient1 (red) and Patient2 (blue). The feature distribution of the training data (NA12878) is compared to the feature distribution of the two test samples, Patient1 and Patient2 using a wilcoxon paired test and the two p-values are reported in each feature plot; p-value p1 (comparing NA12878 and Patient1 distributions) and p-value p2 (comparing NA12878 and Patient2 distributions).

**Supplementary Table 1. Overview of MinION sequencing runs performed for Patient1 and Patient2.**

| Supplementary Table 1. |                          |                  |               |         |                  |          |        |
|------------------------|--------------------------|------------------|---------------|---------|------------------|----------|--------|
| run_number             | run_ID                   | flowcell_version | flowcell_name | library | library kit      | date     | MinION |
| 1                      | Patient1_lib1_1          | R7               |               | 2D      | 2D ligation prep | 26/04/16 | Mk1    |
| 2                      | Patient1_lib1_2          | R7               |               | 2D      | 2D ligation prep | 26/04/16 | Mk1    |
| 3                      | Patient1_lib2_1          | R7               |               | 2D      | 2D ligation prep | 03/05/16 | Mk1    |
| 4                      | Patient1_lib2_2          | R7               |               | 2D      | 2D ligation prep | 03/05/16 | Mk1    |
| 5                      | Patient1_lib2_3          | R7               |               | 2D      | 2D ligation prep | 03/05/16 | Mk1    |
| 6                      | Patient1_lib2_4          | R7               |               | 2D      | 2D ligation prep | 03/05/16 | Mk1    |
| 7                      | Patient1_lib3_1          | R7               |               | 2D      | 2D ligation prep | 04/05/16 | Mk1    |
| 8                      | Patient1_lib3_2          | R7               |               | 2D      | 2D ligation prep | 04/05/16 | Mk1    |
| 9                      | Patient1_lib3_3          | R7               |               | 2D      | 2D ligation prep | 04/05/16 | Mk1    |
| 10                     | Patient1_lib3_4          | R7               |               | 2D      | 2D ligation prep | 04/05/16 | Mk1    |
| 11                     | Patient1_lib4_1          | R7               |               | 2D      | 2D ligation prep | 09/05/16 | Mk1    |
| 11                     | Patient1_lib4_1_restart  | R7               |               | 2D      | 2D ligation prep | 10/05/16 | Mk1    |
| 11                     | Patient1_lib4_1_restart2 | R7               |               | 2D      | 2D ligation prep | 11/05/16 | Mk1    |
| 12                     | Patient1_lib4_2          | R7               |               | 2D      | 2D ligation prep | 09/05/16 | Mk1    |
| 12                     | Patient1_lib4_2_restart  | R7               |               | 2D      | 2D ligation prep | 10/05/16 | Mk1    |
| 13                     | Patient1_lib4_3          | R7               |               | 2D      | 2D ligation prep | 09/05/16 | Mk1    |
| 14                     | Patient1_lib4_4          | R7               |               | 2D      | 2D ligation prep | 09/05/16 | Mk1    |
| 15                     | Patient1_lib5_1          | R7               |               | 2D      | 2D ligation prep | 11/05/16 | Mk1    |
| 15                     | Patient1_lib5_1_restart  | R7               |               | 2D      | 2D ligation prep | 12/05/16 | Mk1    |
| 16                     | Patient1_lib5_2          | R7               |               | 2D      | 2D ligation prep | 11/05/16 | Mk1    |
| 17                     | Patient1_lib5_3          | R7               |               | 2D      | 2D ligation prep | 11/05/16 | Mk1    |
| 17                     | Patient1_lib5_3_restart  | R7               |               | 2D      | 2D ligation prep | 12/05/16 | Mk1    |
| 18                     | Patient1_lib5_4          | R7               |               | 2D      | 2D ligation prep | 11/05/16 | Mk1    |
| 19                     | Patient1_lib6_1          | R7               |               | 2D      | 2D ligation prep | 23/05/16 | Mk1    |
| 20                     | Patient1_lib6_2          | R7               |               | 2D      | 2D ligation prep | 23/05/16 | Mk1    |
| 21                     | Patient1_lib7_1          | R7               |               | 2D      | 2D ligation prep | 26/05/16 | Mk1    |
| 22                     | Patient1_lib7_2          | R7               |               | 2D      | 2D ligation prep | 26/05/16 | Mk1    |
| 23                     | Patient1_lib8_1          | R7               |               | 2D      | 2D ligation prep | 30/05/16 | Mk1B   |
| 24                     | Patient1_lib8_2          | R7               |               | 2D      | 2D ligation prep | 30/05/16 | Mk1    |
| 25                     | Patient1_lib9_1          | R7               |               | 2D      | 2D ligation prep | 31/05/16 | Mk1    |
| 26                     | Patient1_lib9_2          | R7               |               | 2D      | 2D ligation prep | 31/05/16 | Mk1    |
| 27                     | Patient1_lib10_1         | R7               |               | 2D      | 2D ligation prep | 01/06/16 | Mk1B   |
| 28                     | Patient1_lib11_1         | R7               |               | 2D      | 2D ligation prep | 06/06/16 | Mk1    |
| 29                     | Patient1_lib11_2         | R7               |               | 2D      | 2D ligation prep | 06/06/16 | Mk1B   |
| 30                     | Patient1_lib11_3         | R7               |               | 2D      | 2D ligation prep | 06/06/16 | Mk1    |
| 31                     | Patient1_lib11_4         | R7               |               | 2D      | 2D ligation prep | 06/06/16 | Mk1    |
| 32                     | Patient1_lib12_1         | R7               |               | 2D      | 2D ligation prep | 08/06/16 | Mk1    |
| 33                     | Patient1_lib12_2         | R7               |               | 2D      | 2D ligation prep | 08/06/16 | Mk1    |
| 34                     | Patient1_lib12_3         | R7               |               | 2D      | 2D ligation prep | 08/06/16 | Mk1B   |
| 35                     | Patient1_lib12_4         | R7               |               | 2D      | 2D ligation prep | 08/06/16 | Mk1    |
| 36                     | Patient1_lib12_5         | R7               |               | 2D      | 2D ligation prep | 08/06/16 | Mk1    |
| 37                     | Patient1_lib13_1         | R7               |               | 2D      | 2D ligation prep | 13/06/16 | Mk1    |
| 38                     | Patient1_lib13_2         | R7               |               | 2D      | 2D ligation prep | 13/06/16 | Mk1    |
| 39                     | Patient1_lib13_3         | R7               |               | 2D      | 2D ligation prep | 13/06/16 | Mk1B   |
| 40                     | Patient1_lib13_4         | R7               |               | 2D      | 2D ligation prep | 13/06/16 | Mk1    |
| 41                     | Patient1_lib13_5         | R7               |               | 2D      | 2D ligation prep | 13/06/16 | Mk1    |
| 42                     | Patient1_lib14_1         | R9               |               | 2D      | 2D ligation prep | 16/06/16 | Mk1    |
| 43                     | Patient1_lib14_2         | R9               |               | 2D      | 2D ligation prep | 16/06/16 | Mk1    |
| 44                     | Patient1_lib14_3         | R9               |               | 2D      | 2D ligation prep | 16/06/16 | Mk1B   |
| 45                     | Patient1_lib14_4         | R9               |               | 2D      | 2D ligation prep | 16/06/16 | Mk1    |
| 46                     | Patient1_lib14_5         | R9               |               | 2D      | 2D ligation prep | 16/06/16 | Mk1    |
| 47                     | Patient1_lib15_1         | R9               |               | 2D      | 2D ligation prep | 21/06/16 | Mk1    |
| 48                     | Patient1_lib15_2         | R9               |               | 2D      | 2D ligation prep | 21/06/16 | Mk1    |
| 49                     | Patient1_lib15_3         | R9               |               | 2D      | 2D ligation prep | 21/06/16 | Mk1    |
| 50                     | Patient1_lib15_4         | R9               |               | 2D      | 2D ligation prep | 21/06/16 | Mk1B   |
| 51                     | Patient1_lib15_5         | R9               |               | 2D      | 2D ligation prep | 21/06/16 | Mk1    |
| 52                     | Patient1_lib15_6         | R9               |               | 2D      | 2D ligation prep | 21/06/16 | Mk1    |
| 53                     | Patient1_lib16_1         | R7               |               | 2D      | 2D ligation prep | 23/06/16 | Mk1    |
| 54                     | Patient1_lib16_2         | R7               |               | 2D      | 2D ligation prep | 23/06/16 | Mk1B   |
| 54                     | Patient1_lib16_2re       | R7               |               | 2D      | 2D ligation prep | 23/06/16 | Mk1B   |
| 55                     | Patient1_lib16_3         | R7               |               | 2D      | 2D ligation prep | 23/06/16 | Mk1    |
| 56                     | Patient1_lib17_1         | R9               |               | 2D      | 2D ligation prep | 01/07/16 | Mk1B   |
| 57                     | Patient1_lib17_2         | R9               |               | 2D      | 2D ligation prep | 01/07/16 | Mk1B   |
| 58                     | Patient1_lib18_1         | R9               |               | 2D      | 2D ligation prep | 04/07/16 | Mk1B   |
| 59                     | Patient1_lib18_2         | R9               |               | 2D      | 2D ligation prep | 04/07/16 | Mk1B   |
| 60                     | Patient1_lib18_3         | R9               |               | 2D      | 2D ligation prep | 04/07/16 | Mk1B   |
| 61                     | Patient1_lib18_4         | R9               |               | 2D      | 2D ligation prep | 04/07/16 | Mk1B   |
| 62                     | Patient1_lib18_5         | R9               |               | 2D      | 2D ligation prep | 04/07/16 | Mk1B   |
| 63                     | Patient1_lib18_6         | R9               |               | 2D      | 2D ligation prep | 04/07/16 | Mk1B   |

|     |                                 |      |            |             |                  |            |      |
|-----|---------------------------------|------|------------|-------------|------------------|------------|------|
| 64  | Patient1_lib19_1                | R9   |            | 2D          | 2D ligation prep | 07/07/16   | Mk1B |
| 65  | Patient1_lib19_2                | R9   |            | 2D          | 2D ligation prep | 07/07/16   | Mk1B |
| 66  | Patient1_lib19_3                | R9   |            | 2D          | 2D ligation prep | 07/07/16   | Mk1B |
| 67  | Patient1_lib19_4                | R9   |            | 2D          | 2D ligation prep | 07/07/16   | Mk1B |
| 68  | Patient1_lib19_5                | R9   |            | 2D          | 2D ligation prep | 07/07/16   | Mk1B |
| 69  | Patient1_lib20_1                | R9   |            | 2D          | 2D ligation prep | 12/07/16   | Mk1B |
| 70  | Patient1_lib20_2                | R9   |            | 2D          | 2D ligation prep | 12/07/16   | Mk1B |
| 71  | Patient1_lib20_3                | R9   |            | 2D          | 2D ligation prep | 12/07/16   | Mk1B |
| 72  | Patient1_lib20_4                | R9   |            | 2D          | 2D ligation prep | 12/07/16   | Mk1B |
| 73  | Patient1_lib20_5                | R9   |            | 2D          | 2D ligation prep | 12/07/16   | Mk1B |
| 74  | Patient1_lib20_6                | R9   |            | 2D          | 2D ligation prep | 12/07/16   | Mk1B |
| 75  | Patient1_lib21_1                | R9   |            | 2D          | 2D ligation prep | 14/07/16   | Mk1B |
| 76  | Patient1_lib21_2                | R9   |            | 2D          | 2D ligation prep | 14/07/16   | Mk1B |
| 77  | Patient1_lib21_3                | R9   |            | 2D          | 2D ligation prep | 14/07/16   | Mk1B |
| 78  | Patient1_lib21_4                | R9   |            | 2D          | 2D ligation prep | 14/07/16   | Mk1B |
| 79  | Patient1_lib21_5                | R9   |            | 2D          | 2D ligation prep | 14/07/16   | Mk1B |
| 80  | Patient1_lib21_6                | R9   |            | 2D          | 2D ligation prep | 14/07/16   | Mk1B |
| 81  | Patient1_lib23_1                | R9   |            | 2D          | 2D ligation prep | 15/07/16   | Mk1B |
| 82  | Patient1_lib24_1                | R9   |            | 2D          | 2D ligation prep | 19/07/16   | Mk1B |
| 83  | Patient1_lib25_1                | R9   |            | 2D          | 2D ligation prep | 21/07/16   | Mk1B |
| 84  | Patient1_lib25_2                | R9   |            | 2D          | 2D ligation prep | 21/07/16   | Mk1B |
| 85  | Patient1_lib26_1                | R9   |            | 2D          | 2D ligation prep | 25/07/16   | Mk1B |
| 86  | Patient1_lib26_2                | R9   |            | 2D          | 2D ligation prep | 25/07/16   | Mk1B |
| 87  | Patient1_lib26_3                | R9   |            | 2D          | 2D ligation prep | 25/07/16   | Mk1B |
| 88  | Patient1_lib26_4                | R9   |            | 2D          | 2D ligation prep | 25/07/16   | Mk1B |
| 89  | Patient1_lib26_5                | R9   |            | 2D          | 2D ligation prep | 25/07/16   | Mk1B |
| 85  | Patient1_lib26_1_refill         | R9   |            | 2D          | 2D ligation prep | 26/07/16   | Mk1B |
| 86  | Patient1_lib26_2_refill         | R9   |            | 2D          | 2D ligation prep | 26/07/16   | Mk1B |
| 87  | Patient1_lib26_3_refill         | R9   |            | 2D          | 2D ligation prep | 26/07/16   | Mk1B |
| 88  | Patient1_lib26_4_refill         | R9   |            | 2D          | 2D ligation prep | 26/07/16   | Mk1B |
| 89  | Patient1_lib26_5_refill         | R9   |            | 2D          | 2D ligation prep | 26/07/16   | Mk1B |
| 90  | Patient1_lib27_1                | R9   |            | 2D          | 2D ligation prep | 27/07/16   | Mk1B |
| 91  | Patient1_lib27_2                | R9   |            | 2D          | 2D ligation prep | 27/07/16   | Mk1B |
| 92  | Patient1_lib27_3                | R9   |            | 2D          | 2D ligation prep | 27/07/16   | Mk1B |
| 93  | Patient1_lib27_4                | R9   |            | 2D          | 2D ligation prep | 27/07/16   | Mk1B |
| 94  | Patient1_lib27_5                | R9   |            | 2D          | 2D ligation prep | 27/07/16   | Mk1B |
| 95  | Patient1_sheared_ss             | R9   |            | 2D          | 2D ligation prep | 31/08/16   | Mk1B |
| 96  | Patient1_shearedWK              | R9   |            | 2D          | 2D ligation prep | 31/08/16   | Mk1B |
| 97  | Patient1_sheared_ss_run2        | R9   |            | 2D          | 2D ligation prep | 01/09/16   | Mk1B |
| 98  | Patient1_9_20kb_rapidprep       | R9   |            | 1D          | 1D rapid prep    | 07/09/16   | Mk1B |
| 99  | Patient1_9_rapidprep            | R9   |            | 1D          | 1D rapid prep    | 07/09/16   | Mk1B |
| 100 | Patient1_9_rapidprep_lib2       | R9   |            | 1D          | 1D rapid prep    | 14/09/16   | Mk1B |
| 101 | Patient1_8_rapidprep_lib2       | R9   |            | 1D          | 1D rapid prep    | 14/09/16   | Mk1B |
| 102 | Patient1_10_3_1                 | R9   |            | 1D          | 1D rapid prep    | 21/09/16   | Mk1B |
| 103 | Patient1_10_3_2                 | R9   |            | 1D          | 1D rapid prep    | 21/09/16   | Mk1B |
| 104 | Patient1_10_2                   | R9   |            | 1D          | 1D rapid prep    | 21/09/16   | Mk1B |
| 105 | Patient1_10_1                   | R9   |            | 1D          | 1D rapid prep    | 21/09/16   | Mk1B |
| 106 | Patient1_10_4_1                 | R9   |            | 1D          | 1D rapid prep    | 22/09/16   | Mk1B |
| 107 | Patient1_10_4_2                 | R9   |            | 1D          | 1D rapid prep    | 22/09/16   | Mk1B |
| 108 | Patient1_10_4_3                 | R9   |            | 1D          | 1D rapid prep    | 22/09/16   | Mk1B |
| 109 | Patient1_10_5_1_rapid           | R9   |            | 1D          | 1D rapid prep    | 26/09/16   | Mk1B |
| 110 | Patient1_10_5_2_rapid           | R9   |            | 1D          | 1D rapid prep    | 26/09/16   | Mk1B |
| 111 | Patient1_lib28_1                | R9   |            | 2D          | 2D ligation prep | 27/09/16   | Mk1B |
| 112 | Patient1_lib29_1                | R9   |            | 2D          | 2D ligation prep | 27/09/16   | Mk1B |
| 113 | Patient1_lib29_2                | R9   |            | 2D          | 2D ligation prep | 27/09/16   | Mk1B |
| 114 | Patient1_lib30_1                | R9   |            | 2D          | 2D ligation prep | 28/09/16   | Mk1B |
| 115 | Patient1_lib31_1                | R9.4 | FLO-MIN106 | 2D          | 2D ligation prep | 24/10/16   | Mk1B |
| 116 | Patient1_lib31_2                | R9   |            | 2D          | 2D ligation prep | 24/10/16   | Mk1B |
| 117 | Patient1_lib31_3                | R9   |            | 2D          | 2D ligation prep | 24/10/16   | Mk1B |
| 118 | Patient1_lib32_1_1D             | R9.4 | FLO-MIN106 | 1D ligation | 1D ligation prep | 14/11/2016 | Mk1B |
| 119 | Patient1_lib32_1_1D_size_select | R9.4 | FLO-MIN106 | 1D ligation | 1D ligation prep | 15/11/2016 | Mk1B |
| 120 | Patient1_lib33_1_1D             | R9.4 | FLO-MIN106 | 1D ligation | 1D ligation prep | 15/11/2016 | Mk1B |
| 121 | Patient1_X_Rapid_1              | R9.4 | FLO-MIN106 | 1D rapid    | 1D ligation prep | 15/11/2016 | Mk1B |
| 122 | Patient1_lib33_2_1D             | R9.4 | FLO-MIN106 | 1D ligation | 1D ligation prep | 15/11/2016 | Mk1B |
| 123 | Patient2_lib1_2D                | R9.4 | FLO-MIN106 | 2D ligation | 2D ligation prep | 24/11/16   | Mk1B |
| 124 | Patient2_lib2_1D                | R9.4 | FLO-MIN106 | 1D ligation | 1D ligation prep | 28/11/16   | Mk1B |
| 125 | Patient2_lib2_2_1D              | R9.4 | FLO-MIN106 | 1D ligation | 1D ligation prep | 28/11/16   | Mk1B |
| 126 | Patient2_lib3_1_1D              | R9.4 | FLO-MIN106 | 1D ligation | 1D ligation prep | 29/11/16   | Mk1B |
| 127 | Patient2_lib3_2_1D              | R9.4 | FLO-MIN106 | 1D ligation | 1D ligation prep | 29/11/16   | Mk1B |
| 128 | Patient2_lib4_1_1D              | R9.4 | FLO-MIN106 | 1D ligation | 1D ligation prep | 30/11/16   | Mk1B |
| 129 | Patient2_lib4_2_1D              | R9.4 | FLO-MIN106 | 1D ligation | 1D ligation prep | 30/11/16   | Mk1B |
| 130 | Patient2_lib5_1_1D              | R9.4 | FLO-MIN106 | 1D ligation | 1D ligation prep | 05/12/16   | Mk1B |
| 131 | Patient2_lib5_2_1D              | R9.4 | FLO-MIN106 | 1D ligation | 1D ligation prep | 05/12/16   | Mk1B |
| 132 | Patient2_lib6_1_1D              | R9.4 | FLO-MIN106 | 1D ligation | 1D ligation prep | 06/12/16   | Mk1B |
| 133 | Patient2_lib6_2_1D              | R9.4 | FLO-MIN106 | 1D ligation | 1D ligation prep | 06/12/16   | Mk1B |

|     |                    |      |            |             |                  |          |      |
|-----|--------------------|------|------------|-------------|------------------|----------|------|
| 134 | Patient2_lib7_1_1D | R9.4 | FLO-MIN106 | 1D ligation | 1D ligation prep | 07/12/16 | Mk1B |
| 135 | Patient2_lib7_2_1D | R9.4 | FLO-MIN106 | 1D ligation | 1D ligation prep | 07/12/16 | Mk1B |



**Supplementary Table 2. Overview of chromothripsis breakpoint-junctions in Patient1 and Patient2.**

| Patient ID | Sex | Reported Karyotype                 | Breakpoint Junction ID | Chr1 | Pos1      | Chr2 | Pos2      | Orientation | caller overlap |        |           |        |         | sanger validation |                   |
|------------|-----|------------------------------------|------------------------|------|-----------|------|-----------|-------------|----------------|--------|-----------|--------|---------|-------------------|-------------------|
|            |     |                                    |                        |      |           |      |           |             | nanos v        | lump y | sniffle s | mant a | delly   |                   |                   |
| Patient 1  | F   | 46,XX,ins(2;9)(q24.3;p22.1p24.3)dn | id1                    | 2    | 181265670 | 7    | 149006956 | HH          | 5              | 5      | 5         | 5      | 5       | yes               |                   |
|            |     |                                    | id2                    | 2    | 176643961 | 8    | 57149801  | HT          | 5              | 5      | 0         | 5      | 5       | yes               |                   |
|            |     |                                    | id3                    | 9    | 13643427  | 9    | 32391692  | HH          | 4              | 4      | 4         | 4      | 4       | yes               |                   |
|            |     |                                    | id4                    | 9    | 24354925  | 9    | 33924070  | HH          | 4              | 0      | 4         | 4      | 4       | yes               |                   |
|            |     |                                    | id5                    | 9    | 25553959  | 9    | 30707344  | HH          | 4              | 4      | 4         | 4      | 4       | yes               |                   |
|            |     |                                    | id6                    | 2    | 167393746 | 2    | 175139580 | HH          | 4              | 4      | 4         | 4      | 4       | yes               |                   |
|            |     |                                    | id7                    | 2    | 167404983 | 2    | 174873171 | HH          | 4              | 4      | 4         | 4      | 4       | yes               |                   |
|            |     |                                    | id8                    | 2    | 167842499 | 2    | 175197757 | HH          | 4              | 4      | 4         | 4      | 4       | yes               |                   |
|            |     |                                    | id9                    | 2    | 176751445 | 2    | 176857276 | HH          | 4              | 4      | 4         | 4      | 4       | yes               |                   |
|            |     |                                    | id10                   | 2    | 180681362 | 2    | 180737225 | HH          | 4              | 4      | 4         | 4      | 4       | yes               |                   |
|            |     |                                    | id11                   | 2    | 167032703 | 9    | 32809747  | TT          | 5              | 0      | 0         | 5      | 5       | yes               |                   |
|            |     |                                    | id12                   | 9    | 16355040  | 9    | 30707343  | HT          | 2              | 2      | 2         | 2      | 2       | yes               |                   |
|            |     |                                    | id13                   | 9    | 30571114  | 9    | 38487439  | HT          | 2              | 2      | 2         | 2      | 2       | yes               |                   |
|            |     |                                    | id14                   | 8    | 58906797  | 9    | 30076490  | HT          | 5              | 5      | 0         | 5      | 5       | yes               |                   |
|            |     |                                    | id15                   | 8    | 59535603  | 8    | 59767519  | HH          | 4              | 4      | 4         | 4      | 4       | yes               |                   |
|            |     |                                    | id16                   | 2    | 181096216 | 8    | 57149796  | TH          | 5              | 5      | 0         | 5      | 5       | yes               |                   |
|            |     |                                    | id17                   | 2    | 174582947 | 2    | 175479073 | TH          | 1              | 1      | 1         | 1      | 1       | yes               |                   |
|            |     |                                    | id18                   | 2    | 180681358 | 2    | 181414519 | TH          | 1              | 0      | 1         | 1      | 1       | yes               |                   |
|            |     |                                    | id19                   | 2    | 174340626 | 8    | 58906788  | TT          | 5              | 5      | 5         | 5      | 5       | yes               |                   |
|            |     |                                    | id20                   | 2    | 174445536 | 8    | 58550184  | TT          | 5              | 0      | 0         | 5      | 5       | yes               |                   |
|            |     |                                    | id21                   | 2    | 176751445 | 8    | 59767522  | TT          | 5              | 0      | 0         | 5      | 5       | yes               |                   |
|            |     |                                    | id22                   | 2    | 167032588 | 2    | 175479070 | TT          | 4              | 4      | 4         | 4      | 4       | yes               |                   |
|            |     |                                    | id23                   | 2    | 167404982 | 2    | 181414520 | TT          | 4              | 4      | 4         | 4      | 4       | yes               |                   |
|            |     |                                    | id24                   | 2    | 167842499 | 2    | 175139578 | TT          | 4              | 0      | 0         | 4      | 4       | yes               |                   |
|            |     |                                    | id25                   | 2    | 174873089 | 2    | 181265671 | TT          | 4              | 4      | 4         | 4      | 4       | yes               |                   |
|            |     |                                    | id26                   | 2    | 176643950 | 2    | 176857275 | TT          | 4              | 4      | 4         | 4      | 4       | yes               |                   |
|            |     |                                    | id27                   | 2    | 181096226 | 9    | 32391693  | HT          | 5              | 5      | 5         | 5      | 5       | yes               |                   |
|            |     |                                    | id28                   | 2    | 175197731 | 9    | 14497726  | TH          | 5              | 5      | 5         | 5      | 5       | yes               |                   |
|            |     |                                    | id29                   | 9    | 14497718  | 9    | 33924067  | TT          | 4              | 4      | 4         | 4      | 4       | yes               |                   |
|            |     |                                    | id30                   | 9    | 25553961  | 9    | 30570814  | TT          | 4              | 4      | 4         | 4      | 4       | yes               |                   |
|            |     |                                    | id31                   | 2    | 167032588 | 9    | 30076491  | HH          | 5              | 0      | 5         | 5      | 5       | yes               |                   |
|            |     |                                    | id32                   | 2    | 174445538 | 9    | 15353188  | HH          | 5              | 5      | 5         | 5      | 5       | yes               |                   |
|            |     |                                    | id33                   | 9    | 13643428  | 9    | 32809746  | TH          | 1              | 1      | 1         | 1      | 1       | yes               |                   |
|            |     |                                    | id34                   | 9    | 16355037  | 9    | 37701784  | TH          | 1              | 1      | 1         | 1      | 1       | yes               |                   |
|            |     |                                    | id35                   | 9    | 37701783  | 9    | 38487488  | TH          | 1              | 1      | 1         | 1      | 1       | yes               |                   |
|            |     |                                    | id36                   | 7    | 149006954 | 9    | 15353186  | TT          | 5              | 5      | 5         | 5      | 5       | yes               |                   |
|            |     |                                    | id37                   | 2    | 174582948 | 2    | 174894150 | HT          | 2              | 2      | 2         | 2      | 2       | yes               |                   |
|            |     |                                    | id38                   | 2    | 174894154 | 2    | 180737215 | HT          | 2              | 2      | 2         | 2      | 2       | yes               |                   |
|            |     |                                    | id39                   | 2    | 174340639 | 8    | 58550183  | HH          | 5              | 5      | 0         | 5      | 5       | yes               |                   |
|            |     |                                    | id40                   | 8    | 59535601  | 9    | 24354926  | TT          | 5              | 5      | 0         | 5      | 5       | yes               |                   |
| Patient ID | Sex | Reported Karyotype                 | Breakpoint Junction ID | Chr1 | Pos1      | Chr2 | Pos2      | Orientation | delly          | mant a | sniffle s | lump y | nanos v | Redin             | sanger validation |
| Patient 2  | M   | 46,XY,t(1;9;5)(complex)dn          | id1                    | 9    | 15012145  | 9    | 34091571  | TT          | 4              | 4      | 4         | 4      | 4       | 4                 | yes               |
|            |     |                                    | id2                    | 9    | 13513244  | 9    | 14228545  | HT          | 2              | 2      | 2         | 2      | 2       | 2                 | yes               |
|            |     |                                    | id3                    | 9    | 13264315  | 9    | 30099291  | HT          | 2              | 2      | 0         | 0      | 2       | 2                 | yes               |
|            |     |                                    | id4                    | 9    | 13242779  | 9    | 13522348  | TT          | 4              | 4      | 4         | 4      | 4       | 4                 | yes               |
|            |     |                                    | id5                    | 9    | 13218885  | 9    | 13242778  | TH          | 1              | 1      | 1         | 1      | 1       | 1                 | yes               |
|            |     |                                    | id6                    | 9    | 12672158  | 9    | 13183542  | TT          | 4              | 4      | 0         | 0      | 4       | 4                 | yes               |
|            |     |                                    | id7                    | 9    | 12648848  | 9    | 13525736  | HT          | 2              | 2      | 0         | 0      | 2       | 2                 | yes               |
|            |     |                                    | id8                    | 9    | 12648817  | 9    | 14528059  | TT          | 4              | 4      | 0         | 0      | 4       | 4                 | yes               |
|            |     |                                    | id9                    | 9    | 12606162  | 9    | 13183544  | HH          | 4              | 4      | 4         | 4      | 4       | 4                 | yes               |
|            |     |                                    | id10                   | 9    | 12606167  | 9    | 13264316  | TT          | 4              | 4      | 0         | 0      | 4       | 4                 | yes               |
|            |     |                                    | id11                   | 5    | 105819596 | 9    | 22144161  | HT          | 5              | 5      | 0         | 0      | 5       | 5                 | yes               |
|            |     |                                    | id12                   | 5    | 105819379 | 9    | 13218889  | TH          | 5              | 5      | 0         | 5      | 5       | 5                 | yes               |
|            |     |                                    | id13                   | 1    | 231543921 | 9    | 14469693  | TT          | 5              | 5      | 5         | 0      | 5       | 5                 | yes               |
|            |     |                                    | id14                   | 9    | 15593110  | 9    | 22144183  | HH          | 4              | 4      | 4         | 4      | 4       | 4                 | no                |
|            |     |                                    | id15                   | 9    | 13525758  | 9    | 30099287  | HH          | 0              | 0      | 4         | 4      | 4       | 4                 | yes               |
|            |     |                                    | id16                   | 9    | 12640136  | 9    | 34091605  | TH          | 1              | 0      | 1         | 0      | 1       | 1                 | yes               |
|            |     |                                    | id17                   | 9    | 13853145  | 9    | 28554868  | HT          | 2              | 2      | 0         | 0      | 2       | 2                 | yes               |
|            |     |                                    | id18                   | 9    | 14469734  | 9    | 15318845  | HT          | 2              | 0      | 2         | 0      | 2       | 2                 | yes               |
|            |     |                                    | id19                   | 9    | 12672157  | 9    | 13260301  | HT          | 2              | 2      | 2         | 2      | 2       | 2                 | no                |
|            |     |                                    | id20                   | 9    | 13260300  | 9    | 28554865  | HH          | 0              | 0      | 4         | 0      | 4       | 4                 | yes               |
|            |     |                                    | id21                   | 9    | 12640145  | 9    | 13853141  | HT          | 0              | 0      | 2         | 0      | 2       | 2                 | yes               |
|            |     |                                    | id22                   | 1    | 231544018 | 9    | 14228573  | HH          | 0              | 0      | 0         | 0      | 5       | 5                 | yes               |
|            |     |                                    | id23                   | 9    | 6727607   | 9    | 30688945  | TH          | 0              | 0      | 0         | 0      | 1       | 1                 | yes               |
|            |     |                                    | id24                   | 9    | 6728095   | 9    | 30690055  | HT          | 0              | 0      | 0         | 0      | 0       | 2                 | no                |
|            |     |                                    | id25                   | 9    | 14528095  | 9    | 13613209  | HT          | 2              | 2      | 0         | 0      | 2       | 0                 | yes               |
|            |     |                                    | id26                   | 9    | 13613119  | 9    | 14468237  | HH          | 0              | 0      | 0         | 0      | 4       | 0                 | yes               |

|                       |                                                                                                                                           |  |      |   |          |   |          |    |   |   |   |   |   |   |            |
|-----------------------|-------------------------------------------------------------------------------------------------------------------------------------------|--|------|---|----------|---|----------|----|---|---|---|---|---|---|------------|
|                       |                                                                                                                                           |  | id27 | 9 | 14468307 | 9 | 15012828 | TH | 1 | 0 | 0 | 0 | 1 | 0 | yes        |
|                       |                                                                                                                                           |  | id28 | 9 | 15318893 | 9 | 27997913 | HT | 0 | 0 | 2 | 0 | 2 | 2 | no         |
|                       |                                                                                                                                           |  | id29 | 9 | 14467216 | 9 | 15012817 | HT | 2 | 2 | 2 | 0 | 2 | 0 | yes        |
|                       |                                                                                                                                           |  | id30 | 9 | 15012738 | 9 | 15593114 | HT | 2 | 2 | 2 | 0 | 2 | 0 | yes        |
|                       |                                                                                                                                           |  | id31 | 9 | 13612748 | 9 | 27998195 | TH | 0 | 0 | 0 | 0 | 0 | 1 | no         |
|                       |                                                                                                                                           |  | id32 | 9 | 13613355 | 9 | 14466984 | HT | 0 | 0 | 0 | 0 | 0 | 2 | not tested |
| <b>Orientation</b>    | <b>H=head; T=tail</b>                                                                                                                     |  |      |   |          |   |          |    |   |   |   |   |   |   |            |
| <b>Caller overlap</b> | <b>0=no overlap; 1-5=overlap; numbers indicate type of breakpoint junction as derived from the breakpoint orientation and coordinates</b> |  |      |   |          |   |          |    |   |   |   |   |   |   |            |

## Supplementary References

1. Yang, C., Chu, J., Warren, R. L. & Birol, I. NanoSim: nanopore sequence read simulator based on statistical characterization. *Gigascience* (2017).  
doi:10.1093/gigascience/gix010
2. Layer, R. M., Chiang, C., Quinlan, A. R. & Hall, I. M. LUMPY: a probabilistic framework for structural variant discovery. *Genome Biol.* **15**, R84 (2014).
3. Sedlazeck, F. J. *et al.* Accurate detection of complex structural variations using single molecule sequencing. (2017). doi:10.1101/169557
4. Redin, C. *et al.* The genomic landscape of balanced cytogenetic abnormalities associated with human congenital anomalies. *Nat. Genet.* (2016). doi:10.1038/ng.3720
5. Li, H. Minimap and miniasm: fast mapping and de novo assembly for noisy long sequences. *Bioinformatics* **32**, 2103–2110 (2016).
6. Sudmant, P. H. *et al.* An integrated map of structural variation in 2,504 human genomes. *Nature* **526**, 75–81 (2015).
